# Supplementary material
Source: PubMed Central journal article supplement (PMC8314734)

# Clas Ahlm

Disclosure Purpose: 21-10716

## Summary of Interests

### Company or Organization

| Entity           | Type             | Interest Held By |
|------------------|------------------|------------------|
| Umeå Universitet | Grant / Contract | Self             |

*Recipient Name:* Clas Ahlm

*Grant / Contract Description:* Research grant RV-938855 2021-2023.

*Additional Information:* I have received a research grant for studies of Covid-19 and hantavirus immunity. The grant is a collaborative grant from Umeå University and Region Västerbotten, Sweden.

*Recipient Type:* Individual

*Grant / Contract Purpose:* Research

## Additional Questions:

- Are there other relationships or activities that readers could perceive to have influenced, or that give the appearance of potentially influencing, what you wrote in the submitted work?**  
No.
- What is the manuscript title?**  
Heterologous ChAdOx-1:mRNA-1273 Vaccination
- Are you the corresponding author?**  
No.

## Certification

I certify that the information provided in this disclosure is complete and accurate.

**Disclosure Purpose:** 21-10716

Summary of Interests

I do not have any interests to disclose at this time.

Additional Questions:

- 1. **Are there other relationships or activities that readers could perceive to have influenced, or that give the appearance of potentially influencing, what you wrote in the submitted work?**  
No.
- 2. **What is the manuscript title?**  
Heterologous ChAdOx-1:mRNA-1273 Vaccination
- 3. **Are you the corresponding author?**  
No.

Certification

I certify that the information provided in this disclosure is complete and accurate.

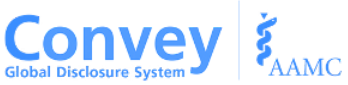

**Disclosure Purpose:** 21-10716

### Summary of Interests

I do not have any interests to disclose at this time.

### Additional Questions:

- Are there other relationships or activities that readers could perceive to have influenced, or that give the appearance of potentially influencing, what you wrote in the submitted work?**  
No.
- What is the manuscript title?**  
Heterologous ChAdOx-1:mRNA-1273 Vaccination
- Are you the corresponding author?**  
No.

### Certification

I certify that the information provided in this disclosure is complete and accurate.

**Disclosure Purpose:** 21-10716

**Summary of Interests**

I do not have any interests to disclose at this time.

**Additional Questions:**

- 1. **Are there other relationships or activities that readers could perceive to have influenced, or that give the appearance of potentially influencing, what you wrote in the submitted work?**  
No.
- 2. **What is the manuscript title?**  
Heterologous ChAdOx-1:mRNA-1273 Vaccination
- 3. **Are you the corresponding author?**  
No.

**Certification**

I certify that the information provided in this disclosure is complete and accurate.

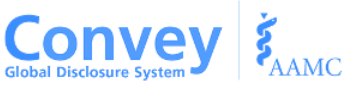

**Disclosure Purpose:** 21-10716

**Summary of Interests**

I do not have any interests to disclose at this time.

**Additional Questions:**

- 1. **Are there other relationships or activities that readers could perceive to have influenced, or that give the appearance of potentially influencing, what you wrote in the submitted work?**  
No.
- 2. **What is the manuscript title?**  
Heterologous ChAdOx-1:mRNA-1273 Vaccination
- 3. **Are you the corresponding author?**  
No.

**Certification**

I certify that the information provided in this disclosure is complete and accurate.

**Disclosure Purpose:** 21-10716

### Summary of Interests

I do not have any interests to disclose at this time.

### Additional Questions:

- Are there other relationships or activities that readers could perceive to have influenced, or that give the appearance of potentially influencing, what you wrote in the submitted work?**  
No.
- What is the manuscript title?**  
Heterologous ChAdOx-1:mRNA-1273 Vaccination
- Are you the corresponding author?**  
No.

### Certification

I certify that the information provided in this disclosure is complete and accurate.

Disclosure Purpose: 21-10716

## Summary of Interests

### Company or Organization

| Entity                                                                                                                                                                                                             | Type             | Interest Held By                                                               |
|--------------------------------------------------------------------------------------------------------------------------------------------------------------------------------------------------------------------|------------------|--------------------------------------------------------------------------------|
| <a href="#">Science for Life Laboratory</a>                                                                                                                                                                        | Grant / Contract | Self                                                                           |
| <i>Recipient Name:</i> Mattias Forsell<br><i>Grant / Contract Description:</i> DNR VC-2020-0015<br><i>Additional Information:</i> Knut and Alice Wallenberg supported COVID-19 research program on vaccine effects |                  | <i>Recipient Type:</i> Individual<br><i>Grant / Contract Purpose:</i> Research |
| <a href="#">Vetenskapsrådet</a>                                                                                                                                                                                    | Grant / Contract | Self                                                                           |
| <i>Recipient Name:</i> Mattias Forsell<br><i>Grant / Contract Description:</i> DNR 2020-06235<br><i>Additional Information:</i> Consolidator grant for research on viruses and virus-caused disease conditions     |                  | <i>Recipient Type:</i> Individual<br><i>Grant / Contract Purpose:</i> Research |

## Additional Questions:

- Are there other relationships or activities that readers could perceive to have influenced, or that give the appearance of potentially influencing, what you wrote in the submitted work?**  
No.
- What is the manuscript title?**  
Heterologous ChAdOx-1:mRNA-1273 Vaccination
- Are you the corresponding author?**  
Yes.
  - Please list the other authors' names here.**  
Mattias Forsell Johan Normark Clas Ahlm Alicia Edin Magnus Evander Yong-Dae Gwon Andy Dernstedt Linnea Vikström Ida-Lisa Persson Tove Björsell Jonas Klingström Wanda Christ Staffan Tevell

## Certification

I certify that the information provided in this disclosure is complete and accurate.

**Disclosure Purpose:** 21-10716

Summary of Interests

I do not have any interests to disclose at this time.

Additional Questions:

- 1. **Are there other relationships or activities that readers could perceive to have influenced, or that give the appearance of potentially influencing, what you wrote in the submitted work?**  
No.
- 2. **What is the manuscript title?**  
Heterologous ChAdOx-1:mRNA-1273 Vaccination
- 3. **Are you the corresponding author?**  
No.

Certification

I certify that the information provided in this disclosure is complete and accurate.

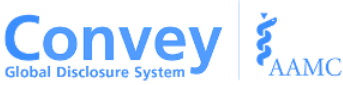



Disclosure Purpose: 21-10716

## Summary of Interests

### Company or Organization

| Entity                                                                                                                                                   | Type             | Interest Held By                                                               |
|----------------------------------------------------------------------------------------------------------------------------------------------------------|------------------|--------------------------------------------------------------------------------|
| <a href="#">Centrum för innovativ medicin</a>                                                                                                            | Grant / Contract | Self                                                                           |
| <i>Recipient Name:</i> Jonas Klingström<br><i>Grant / Contract Description:</i> Research grant<br><i>Additional Information:</i> grant number 20200141   |                  | <i>Recipient Type:</i> Individual<br><i>Grant / Contract Purpose:</i> Research |
| <a href="#">Vetenskapsrådet</a>                                                                                                                          | Grant / Contract | Self                                                                           |
| <i>Recipient Name:</i> Jonas Klingström<br><i>Grant / Contract Description:</i> Research grant<br><i>Additional Information:</i> Grant number 2020-05782 |                  | <i>Recipient Type:</i> Individual<br><i>Grant / Contract Purpose:</i> Research |

## Additional Questions:

- Are there other relationships or activities that readers could perceive to have influenced, or that give the appearance of potentially influencing, what you wrote in the submitted work?**  
No.
- What is the manuscript title?**  
Heterologous ChAdOx-1:mRNA-1273 vaccination
- Are you the corresponding author?**  
No.

## Certification

I certify that the information provided in this disclosure is complete and accurate.

**Disclosure Purpose:** 21-10716

## Summary of Interests

| Company or Organization                                                                                                                    |                  |                                                                                |
|--------------------------------------------------------------------------------------------------------------------------------------------|------------------|--------------------------------------------------------------------------------|
| Entity                                                                                                                                     | Type             | Interest Held By                                                               |
| <a href="#">Knut och Alice Wallenbergs Stiftelse</a>                                                                                       | Grant / Contract | Self                                                                           |
| <i>Recipient Name:</i> Johan Normark<br><i>Grant / Contract Description:</i> Associated researcher grant<br><i>Additional Information:</i> |                  | <i>Recipient Type:</i> Individual<br><i>Grant / Contract Purpose:</i> Research |

## Additional Questions:

- Are there other relationships or activities that readers could perceive to have influenced, or that give the appearance of potentially influencing, what you wrote in the submitted work?**  
No.
- What is the manuscript title?**  
Heterologous ChAdOx-1.mRNA-1273 Vaccination
- Are you the corresponding author?**  
No.

## Certification

I certify that the information provided in this disclosure is complete and accurate.

**Disclosure Purpose:** 21-10716

**Summary of Interests**

I do not have any interests to disclose at this time.

**Additional Questions:**

- 1. Are there other relationships or activities that readers could perceive to have influenced, or that give the appearance of potentially influencing, what you wrote in the submitted work?**  
No.
- 2. What is the manuscript title?**  
Heterologous ChAdOx-1:mRNA-1273 Vaccination
- 3. Are you the corresponding author?**  
No.

**Certification**

I certify that the information provided in this disclosure is complete and accurate.



**Disclosure Purpose:** 21-10716

**Summary of Interests**

I do not have any interests to disclose at this time.

**Additional Questions:**

- 1. **Are there other relationships or activities that readers could perceive to have influenced, or that give the appearance of potentially influencing, what you wrote in the submitted work?**  
No.
- 2. **What is the manuscript title?**  
Heterologous ChAdOx-1:mRNA-1273 Vaccination
- 3. **Are you the corresponding author?**  
No.

**Certification**

I certify that the information provided in this disclosure is complete and accurate.



**Disclosure Purpose:** 21-10716

**Summary of Interests**

I do not have any interests to disclose at this time.

**Additional Questions:**

- 1. **Are there other relationships or activities that readers could perceive to have influenced, or that give the appearance of potentially influencing, what you wrote in the submitted work?**  
No.
- 2. **What is the manuscript title?**  
Heterologous ChAdOx-1:mRNA-1273 Vaccination
- 3. **Are you the corresponding author?**  
No.

**Certification**

I certify that the information provided in this disclosure is complete and accurate.

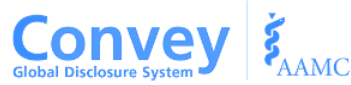

Supplement: NEJMc2110716_disclosures.pdf [file NEJMc2110716_disclosures.pdf]
