# Supplementary material
Source: PubMed Central journal article supplement (PMC8314734)
Supplement: NEJMc2110716_protocol.pdf [file NEJMc2110716_protocol.pdf]

# Protocol

This trial protocol has been provided by the authors to give readers additional information about their work.

Protocol for: Normark J, Vikström L, Gwon Y-D, et al. Heterologous ChAdOx1 nCoV-19 and mRNA-1273 vaccination. *N Engl J Med*. DOI: 10.1056/NEJMc2110716

**This supplement contains the following items:**

1. Original protocol (pg 2-32)
2. summary of changes to protocol (pg 33)
3. Original statistical analysis plan, final statistical analysis plan, summary of changes (pg 34)
4. Final protocol (pg 35-66 )

## **CoVacc**

# **Immunsvär vid vaccination mot Covid-19, en öppen multicenter fas IV studie**

---

Studiekod: CoVacc

EudraCT nummer: 2021-000683-30

Versionsnummer: 1.1

Datum: 2021-03-02

Sponsor/Koordinerande  
prövare: Clas Ahlm,  
Titel Professor, överläkare

---

Studiekod: CoVacc  
Version Nr: 1.1  
Datum: 2021-03-02  
EudraCT Nr: 2021-000683-30

## Innehåll

|                                                                          |    |
|--------------------------------------------------------------------------|----|
| Signatursida .....                                                       | 5  |
| Kontaktuppgifter .....                                                   | 7  |
| Lista över använda akronymer och förkortningar .....                     | 9  |
| 1. Synopsis .....                                                        | 10 |
| 2. Bakgrundsinformation och rational .....                               | 12 |
| 3. Nytt-Risk värdering.....                                              | 13 |
| 4. Syfte .....                                                           | 14 |
| 4.1. Primär frågeställning .....                                         | 14 |
| 4.2. Sekundär frågeställningar .....                                     | 14 |
| 4.3. Primärt utfallsmått (variabel).....                                 | 14 |
| 4.4. Sekundära utfallsmått (variabler) .....                             | 15 |
| 5. Studiedesign och Procedur .....                                       | 15 |
| 5.1. Övergripande studiedesign .....                                     | 15 |
| 5.2. Procedurer och flödesschema.....                                    | 15 |
| 5.2.1. Inklusion och 0 provtagning: .....                                | 16 |
| 5.2.2. Uppföljande besök efter Covid-19 vaccination .....                | 16 |
| 5.2.3. Besök 3 månader efter första vaccindos:.....                      | 16 |
| 5.2.4. Besök uppföljning 6 månader till 4 år efter första vaccindos..... | 17 |
| 5.3. Biologiska provtagningsförfaranden .....                            | 18 |
| 5.3.1. Hantering, lagring och destruktion av biologiska prover .....     | 18 |
| 5.3.2. Total volym blod per forskningsperson.....                        | 18 |
| 5.3.3. Biobank .....                                                     | 19 |
| 5.4. Studieavslut.....                                                   | 19 |
| 6. Urval av forskningspersoner .....                                     | 19 |
| 6.1. Inklusionskriterier.....                                            | 19 |
| 6.2. Exklusionskriterier .....                                           | 19 |
| 6.3. Screening.....                                                      | 20 |
| 6.4. Avbrottskriterier .....                                             | 20 |
| 7. Prövningsläkemedel.....                                               | 20 |

Studiekod: CoVacc  
Version Nr: 1.1  
Datum: 2021-03-02  
EudraCT Nr: 2021-000683-30

|         |                                                                          |    |
|---------|--------------------------------------------------------------------------|----|
| 7.1.    | Beskrivning av prövningsläkemedel .....                                  | 20 |
| 7.2.    | Dos och administreringsätt.....                                          | 20 |
| 7.3.    | Packning, märkning, och hantering av prövningsläkemedel.....             | 20 |
| 7.4.    | Spårbarhet och följsamhet till behandling.....                           | 20 |
| 7.5.    | Samtidig användning av andra läkemedel.....                              | 21 |
| 7.6.    | Behandling efter studiens slut.....                                      | 21 |
| 8.      | Metoder för mätning av utfallsmått för klinisk effekt och säkerhet ..... | 21 |
| 8.1.    | Metoder för mätning av utfallsmått för klinisk effekt och säkerhet ..... | 21 |
| 8.1.1.  | Primärt utfallsmått (variabel).....                                      | 21 |
| 8.1.2.  | Sekundära utfallsmått (variabler).....                                   | 21 |
| 9.      | Hantering av ogynnsamma medicinska händelser.....                        | 21 |
| 9.1.    | Definitioner .....                                                       | 22 |
| 9.1.1.  | Incident (Adverse Event, AE).....                                        | 22 |
| 9.1.2.  | Biverkning (Adverse Reaction, AR).....                                   | 22 |
| 9.1.3.  | Allvarlig incident (Serious Adverse Event, SAE).....                     | 22 |
| 9.1.4.  | Misstänkt allvarlig oförutsedd biverkning (SUSAR).....                   | 23 |
| 9.2.    | Bedömning av potentiella SUSAR .....                                     | 23 |
| 9.2.1.  | Bedömning av orsakssamband.....                                          | 23 |
| 9.2.2.  | Bedömning av intensitet .....                                            | 23 |
| 9.2.3.  | Bedömning av svårighetsgrad .....                                        | 24 |
| 9.3.    | Rapportering av incidenter .....                                         | 24 |
| 9.3.1.  | Listning av incidenter (AE) .....                                        | 24 |
| 9.3.2.  | Rapportering av allvarliga incidenter (SAE).....                         | 24 |
| 9.3.3.  | Registrering och rapportering av allvarliga incidenter (SUSAR).....      | 24 |
| 9.4.    | Årlig säkerhetsrapport (Development Safety Update Report, DSUR).....     | 25 |
| 9.5.    | Referenssäkerhetsinformation.....                                        | 25 |
| 10.     | Statistik.....                                                           | 25 |
| 10.1.   | Statistisk analys .....                                                  | 25 |
| 10.1.1. | Statistisk metod.....                                                    | 25 |
| 10.1.2. | Bortfall .....                                                           | 25 |
| 10.2.   | Justering av signifikans och konfidensintervall .....                    | 25 |
| 10.3.   | Dimensionsberäkning .....                                                | 26 |

Studiekod: CoVacc  
Version Nr: 1.1  
Datum: 2021-03-02  
EudraCT Nr: 2021-000683-30

|                                                                           |    |
|---------------------------------------------------------------------------|----|
| 10.4. Interimsanalys.....                                                 | 26 |
| 11. Kvalitetskontroll och kvalitetssäkring.....                           | 26 |
| 11.1. Kvalitetssäkring och sponsors övervakning.....                      | 26 |
| 11.2. Monitorering.....                                                   | 26 |
| 11.3. Källdata.....                                                       | 27 |
| 11.4. Avvikelse eller allvariga överträdelser.....                        | 27 |
| 11.5. Audit och inspektioner.....                                         | 27 |
| 12. Etik.....                                                             | 27 |
| 12.1. Följsamhet till protokollet, GCP och regelverket.....               | 27 |
| 12.2. Etikprövning av studien.....                                        | 27 |
| 12.3. Procedur för inhämtande av informerat samtycke.....                 | 28 |
| 12.4. Dataskydd.....                                                      | 28 |
| 12.5. Försäkringar.....                                                   | 29 |
| 13. Väsentlig ändring av studien.....                                     | 29 |
| 14. Insamling, hantering och arkivering av data.....                      | 29 |
| 14.1. Case Report Form (Forskningspersonsformulär).....                   | 30 |
| 15. Meddelande att studien är avslutad, rapportering och publicering..... | 30 |
| 16. Referenser.....                                                       | 30 |

Studiekod: CoVacc  
Version Nr: 1.1  
Datum: 2021-03-02  
EudraCT Nr: 2021-000683-30

## Signatursida

### **Sponsor/Koordinerande prövare**

Jag har ansvar för att det här protokollet innehåller alla essentiella delar för att genomföra studien. Jag kommer att delge protokollet och all annan viktig studierelaterad information till ansvariga prövare för att de ska kunna genomföra studien på rätt sätt. Jag är medveten om mitt ansvar att hålla de medarbetare som arbetar med studien informerade och utbildade.

Genom min underskrift godkänner jag att genomföra studien enligt detta protokoll, Helsingforsdeklarationen, ICH GCP (god klinisk sed) och de gällande nationella och internationella regelverk som berör denna kliniska studie.

Jag kommer att delge protokollet och all annan viktig studierelaterad information till de medarbetare och prövare som medverkar i studien, för att de ska kunna utföra studien på rätt sätt. Jag är medveten om mitt ansvar att kontinuerligt hålla medarbetare och prövare som arbetar med studien informerade och utbildade.

Jag är medveten om att kvalitetskontroll kommer att ske av studien i form av monitorering, audit och eventuell inspektion.

Sponsors/Koordinerande prövares signatur

Datum

---

---

Clas Ahlm

Studiekod: CoVacc  
Version Nr: 1.1  
Datum: 2021-03-02  
EudraCT Nr: 2021-000683-30

## Huvudprövare

Jag har läst detta protokoll och bedömt att det innehåller alla essentiella delar för att genomföra studien. Genom min underskrift godkänner jag att genomföra studien enligt detta protokoll, Helsingforsdeklarationen, ICH GCP (god klinisk sed) och de gällande nationella och internationella regelverk som berör denna kliniska studie.

Jag kommer att delge protokollet och all annan viktig studierelaterad information till de medarbetare och prövare som medverkar i studien, för att de ska kunna utföra studien på rätt sätt. Jag är medveten om mitt ansvar att kontinuerligt hålla medarbetare och prövare som arbetar med studien informerade och utbildade.

Jag är medveten om att kvalitetskontroll kommer att ske av studien i form av monitorering, audit och eventuell inspektion.

Huvudprövares signatur

Datum

---

---

Signatur

---

Namnförtydligande



Studiekod: CoVacc  
Version Nr: 1.1  
Datum: 2021-03-02  
EudraCT Nr: 2021-000683-30

## Kontaktuppgifter

|                                                        |                                                                                                                                                                                                                                   |
|--------------------------------------------------------|-----------------------------------------------------------------------------------------------------------------------------------------------------------------------------------------------------------------------------------|
| <b>Ansvarsroll i studien</b>                           |                                                                                                                                                                                                                                   |
| <b>Sponsor/Koordinerande prövare Umeå</b>              | Clas Ahlm, professor, överläkare<br>Institutionen för klinisk mikrobiologi<br>Umeå universitet<br>070-317 29 65<br>clas.ahlm@umu.se                                                                                               |
| <b>Forskningshuvudman</b>                              | Umeå Universitet                                                                                                                                                                                                                  |
| <b>Koordinerade monitororganisation</b>                | KFC, Region Västerbotten                                                                                                                                                                                                          |
| <b>Styrgrupp</b>                                       | Mattias Forsell, docent<br><br>Clas Ahlm, professor, överläkare<br><br>Johan Normark, docent, överläkare<br><br>Sara Cajander, PhD, överläkare                                                                                    |
| <b>Studiesite Umeå</b><br><br>Principal Investigator   | Clas Ahlm<br><br>Infektionskliniken, Norrlands<br>Universitetssjukhus<br>901 85 Umeå<br><br>070-317 29 65<br>clas.ahlm@umu.se                                                                                                     |
| <b>Studiesite Örebro</b><br><br>Principal Investigator | Anja Rosdahl, Infektionsspecialist<br><br>Infektionskliniken, Örebro Universitetssjukhus,<br>Region Örebro Län, Södra Grev Rosengatan,<br>701 85 Örebro<br><br>telefon: +46 19-6021157<br>e-mail: anja.rosdahl@regionorebrolan.se |

Studiekod: CoVacc  
Version Nr: 1.1  
Datum: 2021-03-02  
EudraCT Nr: 2021-000683-30

|                                                        |                                                                                                                                                                                                          |
|--------------------------------------------------------|----------------------------------------------------------------------------------------------------------------------------------------------------------------------------------------------------------|
| <b>Ansvarsroll i studien</b>                           |                                                                                                                                                                                                          |
| <b>Studiesite Västerås</b><br>Principal Investigator   | Emeli Månsson, överläkare<br>Infektionskliniken<br>Västmanlands sjukhus, Sigtunagatan<br>721 89 Västerås<br>Tel. 021-173765<br><br>e-mail: emeli.mansson@regionvastmanland.se                            |
| <b>Studiesite Karlstad</b><br>Principal Investigator   | Staffan Tevell, överläkare, MLA,<br>Infektionskliniken<br>Centralsjukhuset Karlstad<br>Rosenborgsgatan 2,<br>651 85 Karlstad<br><br>Tel: 010-831 50 00 (vxl)<br>e-mail: staffan.tevell@regionvarmland.se |
| <b>Studiesite Eskilstuna</b><br>Principal Investigator | Markus Kalén, överläkare<br>Infektionskliniken<br>Kungsvägen 42,<br>633 49 Eskilstuna<br><br>Tel: 016-10 30 00 (vxl)<br>e-mail: markus.kalen@regionsormland.se                                           |

Studiekod: CoVacc  
 Version Nr: 1.1  
 Datum: 2021-03-02  
 EudraCT Nr: 2021-000683-30

## Lista över använda akronymer och förkortningar

| Förkortning | Förklaring                                                                                                                                        |
|-------------|---------------------------------------------------------------------------------------------------------------------------------------------------|
| AE          | Adverse Event = Incident, Ogynnsam medicinsk händelse                                                                                             |
| AR          | Adverse Reaction = Biverkning, d.v.s. varje ogynnsam och oavsedd reaktion på ett prövningsläkemedel, oavsett dos.                                 |
| CRF         | Case Report Form = Datainsamlingsformulär                                                                                                         |
| eCRF        | Elektroniskt Case Report Form – Elektroniskt datainsamlingsformulär                                                                               |
| DSUR        | Development Safety Update Report = Årlig säkerhetsrapport                                                                                         |
| ELISA       | Enzyme-Linked ImmunoSorbent Assay                                                                                                                 |
| GCP         | Good Clinical Practice                                                                                                                            |
| ICH         | International Council for Harmonisation                                                                                                           |
| ITT         | Intention-to-treat = Inkluderar alla data från alla forskningspersoner som deltagit i studien                                                     |
| LV          | Läkemedelsverket                                                                                                                                  |
| LVFS        | Läkemedelverkets författningssamling                                                                                                              |
| mRNA        | messenger/budbärar Ribonukleinsyra                                                                                                                |
| PP          | Per Protokoll analys = Inkluderar endast data från forskningspersoner som genomfört studien helt enligt protokoll, utan några protokollavvikelser |
| REDCap      | Research Electronic Data Capture                                                                                                                  |
| SAE / SAR   | Serious Adverse Event / Serious Adverse Reaction= Allvarlig incident eller biverkning                                                             |
| SARS-CoV-2  | Severe Acute Respiratory Syndrome Corona virus 2                                                                                                  |
| SUSAR       | Suspected Unexpected Serious Adverse Reaction = Misstänkt, allvarlig oförutsedd biverkning                                                        |

Studiekod: CoVacc  
Version Nr: 1.1  
Datum: 2021-03-02  
EudraCT Nr: 2021-000683-30

## 1. Synopsis

|                             |                                                                                                                                                                                                                                                                                                                                                                                                                                                                                                                                                                                                                                                                                                                                                                                                                                                                                                                                                                                                                                                                                                                                                                                                                                                                                                                                                                                                                                    |
|-----------------------------|------------------------------------------------------------------------------------------------------------------------------------------------------------------------------------------------------------------------------------------------------------------------------------------------------------------------------------------------------------------------------------------------------------------------------------------------------------------------------------------------------------------------------------------------------------------------------------------------------------------------------------------------------------------------------------------------------------------------------------------------------------------------------------------------------------------------------------------------------------------------------------------------------------------------------------------------------------------------------------------------------------------------------------------------------------------------------------------------------------------------------------------------------------------------------------------------------------------------------------------------------------------------------------------------------------------------------------------------------------------------------------------------------------------------------------|
| EudraCT nummer:             | 2021-000683-30                                                                                                                                                                                                                                                                                                                                                                                                                                                                                                                                                                                                                                                                                                                                                                                                                                                                                                                                                                                                                                                                                                                                                                                                                                                                                                                                                                                                                     |
| Titel:                      | CoVacc Immunsvaret vid vaccination mot Covid-19                                                                                                                                                                                                                                                                                                                                                                                                                                                                                                                                                                                                                                                                                                                                                                                                                                                                                                                                                                                                                                                                                                                                                                                                                                                                                                                                                                                    |
| Studiekod:                  | CoVacc                                                                                                                                                                                                                                                                                                                                                                                                                                                                                                                                                                                                                                                                                                                                                                                                                                                                                                                                                                                                                                                                                                                                                                                                                                                                                                                                                                                                                             |
| Kort bakgrund/<br>Rational: | <p>I världen pågår fortfarande en pandemi med coronaviruset SARS-CoV-2. Man vet idag betydligt mer om de faktorer som samspelar i interaktionen mellan människa och viruset än då pandemin startade. Covid-19 orsakar framförallt en lungskada under den akuta sjukdomsfasen men kan även orsaka skador i andra organ såsom njurar, lever och centrala nervsystemet (hjärnan) där kognitiv påverkan, smak-och luktbortfall kan vara tidiga symtom. Kunskap saknas i nuläget om immunitetens duration och kvarstående T-cells immunitet efter genomgången sjukdom och hur vaccination påverkar immunitet hos individer med genomgången infektion jämfört med Covid-19 naiva individer.</p> <p>För närvarande har successivt nya behandlingsmetoder förbättrat prognosen hos svårt sjuka patienter. Nya vacciner har utvecklats på rekordtid mot Covid-19. Det finns av naturliga skäl inga långtidsdata vad gäller vaccinets effektivitet eller kvaliteten på immunsvaret över tid vilket denna studie kommer att analysera. Dessutom kommer vi att få kunskap om hur människan utvecklar immunsvaret mot viruset samt även hur människans förmåga att aktivera immunsvaret samverkar med vacciner då individen utvecklar en skyddande immunitet. Förhoppningsvis kan sådan förståelse även bidra till förbättrad design av både själva vaccinerna och de vaccinationsprogram som implementeras nationellt och internationellt.</p> |
| Syfte:                      | <p><b>Syfte:</b> Att studera immunsvaret efter vaccination mot covid-19.</p> <p><b>Primär frågeställning:</b> Hur bildas antikroppar mot SARS-CoV-2 efter vaccination av individer som tidigare haft covid-19 i jämförelse med personer som ej haft Covid-19?</p> <p><b>Sekundära frågeställning:</b></p>                                                                                                                                                                                                                                                                                                                                                                                                                                                                                                                                                                                                                                                                                                                                                                                                                                                                                                                                                                                                                                                                                                                          |

Studiekod: CoVacc  
 Version Nr: 1.1  
 Datum: 2021-03-02  
 EudraCT Nr: 2021-000683-30

|                                               |                                                                                                                                                                                                                                                                                                                                                        |
|-----------------------------------------------|--------------------------------------------------------------------------------------------------------------------------------------------------------------------------------------------------------------------------------------------------------------------------------------------------------------------------------------------------------|
|                                               | <ul style="list-style-type: none"> <li>• Hur god är immuniteten 1 år efter vaccination i dessa två grupper.</li> <li>• Hur påverkar initial aktivering av medfödd immunitet det adaptiva immunsvaret med fokus på primär frågeställning?</li> </ul>                                                                                                    |
| Studiedesign:                                 | Öppen, Multicenter, Fas IV                                                                                                                                                                                                                                                                                                                             |
| Studiepopulation:                             | Naiva och tidigare SARS-CoV-2- exponerade individer                                                                                                                                                                                                                                                                                                    |
| Antal forskningspersoner:                     | 3000                                                                                                                                                                                                                                                                                                                                                   |
| Inklusionskriterier:                          | <ul style="list-style-type: none"> <li>• Samtycker till deltagande i studien</li> <li>• Ålder ≥ 18 år</li> </ul>                                                                                                                                                                                                                                       |
| Exklusionskriterier:                          | <ul style="list-style-type: none"> <li>• Ålder &lt;18 år</li> <li>• Beslutsoförmögna personer</li> <li>• Kontraindikation till vaccination</li> <li>• Svår sjukdom</li> <li>• Pågående läkemedelsbehandling som bedömes påverka vaccinsvaret</li> </ul>                                                                                                |
| Prövningsläkemedel, dosering, administrering: | <p>Covid-19 vaccin som är marknadsgodkänt i Sverige, ges intramuskulärt.</p> <p>Administration och dosering sker enligt godkännande för respektive covid-19 vaccin.<br/>       Vaccinationen sker inom det nationella vaccinationsprogrammet och enligt Folkhälsomyndighetens prioritering och riktlinjer och administreras av regionens personal.</p> |
| Effektutvärdering:                            | <p><b>Primärt utfallsmått</b> (variabel): Nivå av antikroppar mot SARS-CoV-2 S protein årligen upp till fyra år efter vaccination</p> <p><b>Sekundärt utfallsmått</b> (variabler): Analyser för att utreda hur det mänskliga immunförsvaret reagerar vid Covid 19- vaccin.</p>                                                                         |
| Studieperiod:                                 | Q1/Q2 2021 – Q1/Q2 2025                                                                                                                                                                                                                                                                                                                                |

Studiekod: CoVacc  
Version Nr: 1.1  
Datum: 2021-03-02  
EudraCT Nr: 2021-000683-30

## 2. Bakgrundsinformation och rational

Den pågående pandemin med coronaviruset SARS-CoV-2 har medfört ökade kunskaper om de faktorer som samspelar i interaktionen mellan människa och viruset. Covid-19 orsakar framförallt en direkt virusorsakad lungskada under den akuta sjukdomsfasen. Viruset orsakar även skador i andra organ såsom njurar, lever och centrala nervsystemet (hjärnan) där kognitiv påverkan, smak-och luktbortfall kan vara tidiga symtom. Kunskap saknas i nuläget om immunitetens duration och kvarstående T-cells immunitet efter genomgången sjukdom och hur vaccination påverkar immunitet hos individer med genomgången infektion jämfört med Covid-19 naiva individer. Mätbara neutraliserande antikroppar kvarstår minst 5-6 månader efter covid-19 infektion (1) medan det är mindre känt hur länge och starkt B- och T-cells minnet finns kvar efter en naturlig infektion. Preliminära data visar att de som haft Covid-19 svarar med tydligt antikropsvar redan efter en första dos av mRNA vaccin (2,3).

För närvarande har successivt nya behandlingsmetoder förbättrat prognosen hos svårt sjuka patienter. Nya vacciner har utvecklats på rekordtid mot Covid-19. Det finns av naturliga skäl inga långtidsdata vad gäller vaccinets effektivitet eller kvaliteten på immunsvaret över tid vilket denna studie kommer att analysera. Dessutom kommer vi att få kunskap om hur människan utvecklar immunitet mot viruset samt även hur människans förmåga att aktivera inflammatoriska och genetiska system som samverkar med vacciner då individen utvecklar skyddande immunitet. Förhoppningsvis kan sådan förståelse även bidra till förbättrad design av både själva vaccinerna och de vaccinationsprogram som implementeras nationellt och internationellt.

I ett större perspektiv kan man tänka sig att de resultat som framkommer i studien kommer att resultera i ny kunskap om både hur framtida vaccinationer bör genomföras, vilka individer som bör vaccineras, och med hur många doser. Detta kan bidra till en mer effektiv och individualiserad vaccination.

Med anledning av detta kommer vi här generera detaljerad information om hur immunsvaret mot Covid-19-vaccination utvecklas och hur antikropsvar bibehålls över tid både i individer som haft jämfört med de som inte haft tidigare infektion med SARS-CoV-2. För detta ändamål kommer vi att studera vaccininducerat svar i en stor multicenterkohort av väl karakteriserade Covid-19-diagnostiserade individer jämfört med vaccinerade individer som är SARS-CoV-2 naiva. På så sätt har vi möjlighet att jämföra immunsvaret vid infektion med den som sker efter Covid 19-vaccination på cellulär, molekylär och genetisk nivå.

Vår strategi är noggrant utformad för att ge information av högsta intresse för det svenska vaccinationsprogrammet och gör det möjligt för oss att ta itu med välkända kunskapsluckor inom immunologi: Ändrar befintlig immunitet epitopspecifika vaccininducerade svar och vilka medfödda signaler som utlöser immunsvaret som företrädesvis riktar sig mot neutraliserande epitoper?

Vacciner kommer att erbjudas till den vuxna befolkningen i Sverige för att bekämpa den nuvarande SARS-CoV-2-pandemin. Denna studie ger en unik möjlighet att besvara de primära och sekundära frågeställningar vi har.

Studiekod: CoVacc  
Version Nr: 1.1  
Datum: 2021-03-02  
EudraCT Nr: 2021-000683-30

### 3. Nytt-Risk värdering

I denna studie kommer vi utföra extra blodprovstagning på individer som vaccineras mot Covid-19. Vaccinationen kommer följa klinisk rutin och den nationella samordningen kring Covid 19 vaccination i Sverige. Då regionerna inte styr över vilka vaccinsorter som distribueras kommer studien använda sig av de vaccinsorter som för tillfället är tillgängligt.

**Risker:** Riskbedömning för vaccination har tidigare genomförts av läkemedelsverket vid godkännande av de vaccin som nu används för att vaccinera mot covid-19.

Vaccinationen kommer utföras av regionen enligt den nationella samordningen kring Covid 19 vaccination. Sedan tidigare beskrivna biverkningar för respektive vaccinsort är att förvänta vid dessa vaccinationer. Risken för oväntade biverkningar av dessa läkemedel anses som mycket små.

Vid blodprovstagning i studien kan forskningspersonen uppleva viss smärta eller obehag men denna bedöms som försumbar. Covid 19 provtagning med näsprov kan upplevas som obehagligt.

**Steg för att minimera riskerna för forskningspersoner:** Forskningspersonen kommer följas upp enligt studieprotokoll där eventuella oväntade eller allvarliga bieffekter kommer registreras. Forskningspersonen kommer informeras om studien och provtagningen och kommer också ges möjlighet att fundera över sitt deltagande och om eventuella obehag eller smärta är acceptabla. Forskningspersonen kan också när som helst och utan att ange orsak avsluta sitt deltagande i studien.

**Covid-19:** Om Covid-19 pandemin förhindrar forskningspersoner att komma till kliniken enligt fastlagt protokoll kommer prövningen följa klinisk rutin, d.v.s. forskningspersonens besök och skjuts upp enligt klinikens bedömning alternativt kommer uppföljning ske via telefon eller videomöte vilket innebär att all uppföljning och säkerhetsrapportering kommer utföras oavsett hur Covid-19 pandemin kan komma att påverka sjukvården. Skulle en ogynnsam medicinsk händelse kräva sjukvård kommer forskningspersonen omhändertas enligt regionens kliniska rutin då regionen också ansvarar för vaccinationen i studien. Det är deltagaren själv som avgör om denne vill genomgå vaccination.

**Nyttan:** Nyttan med studien är att bättre förstå hur det mänskliga immunförsvaret reagerar på exponering för främmande protein. Informationen vi får genom studien kommer således kunna relateras både till infektion och till vaccination. Målet är att information vi kan samla i denna studie kan bidra till grundläggande kunskap att bättre förstå grundläggande immunologiska mekanismer som kan rationalisera hur olika vaccin kan ges i framtiden för maximal effekt kan avgöra hur intervall på olika vaccin bör utformas för bästa effekt samt ge bättre förståelse för basal reglering av immunsvaret vid infektion och vaccination

Nyttan med den grundläggande immunologiska nyttan kan vara mycket hög och långsiktig, då information kan användas till att designa nya vaccin och vaccinstrategier

Studiekod: CoVacc  
Version Nr: 1.1  
Datum: 2021-03-02  
EudraCT Nr: 2021-000683-30

**Risk/nytta rational:** Vaccinerna mot Covid-19 är prövat i människa och godkänt av svenska Läkemedelsverket. Vaccinationen följer svenska rekommendationer. Dosering följer rekommendationen och det faktum att studier på människa redan är utförda utan då beskrivna allvarliga problem anser vi att riskerna är små för forskningspersonerna som blir vaccinerade enligt regionens vaccinationsprogram.

## 4. Syfte

Vårt primära mål med projektet är att undersöka hur antikroppssvar utvecklas efter Covid-19-vaccination beroende på om man tidigare varit infekterad med SARS-CoV-2 eller inte. Utöver detta syfte ämnar vi klargöra grundläggande immunologiska processer som till stor del är identiska mellan infektion och vaccination; hur expansion av individuella B-cellskloner och immunsvaret i slemhinnor påverkas av tidigare SARS-CoV-2 infektion, samt hur det medfödda immunförsvaret kan påverka vårt adaptiva immunförsvaret efter vaccination. Vi ämnar också isolera och potentiellt sekvensera eventuella virus om en vaccinerad individ ändå blir infekterad med virus.

Sammanfattningsvis, det svenska nationella vaccinationsprogrammet mot Covid-19, i kombination med väl karakteriserade individer med redan existerande immunitet mot Covid-19, utgör ett stort tillfälle att studera hur immunsystemet reagerar på primär eller sekundär antigenutmaning utan förvirrande faktorer för virusreplikation.

Studiens syfte är att generera ny kunskap om hur immunförsvaret reagerar på ny- eller återexponering för proteinantigen.

### 4.1. Primär frågeställning

Vår primära frågeställning är om antikropsutveckling mot SARS-CoV-2 S-protein efter vaccination skiljer sig mellan de som haft tidigare SARS-CoV-2-infektion jämfört Covid-19 naiva individer.

### 4.2. Sekundär frågeställningar

Att bättre förstå hur det mänskliga immunförsvaret reagerar när det blir exponerat för främmande proteinantigen mätt som antikropsnivå i serum, plasma och slemhinna samt på cellulär och genetisk nivå.

De sekundära frågeställningarna är sådana som är generella för att förstå hur det mänskliga immunförsvaret fungerar vid både infektion och vaccination.

### 4.3. Primärt utfallsmått (variabel)

Det primära utfallsmåttet är mätbara bindande antikropsnivåer före och årligen efter vaccination i individer som tidigare varit infekterade med SARS-CoV-2 i jämförelse med antikropsnivåer vid samma tidpunkter i personer som vaccineras mot Covid-19 men inte tidigare varit exponerade för SARS-CoV-2.



Studiekod: CoVacc  
Version Nr: 1.1  
Datum: 2021-03-02  
EudraCT Nr: 2021-000683-30

#### 4.4. Sekundära utfallsmått (variabler)

De sekundära utfallsmåtten inkluderar detaljerade jämförelser av hur individuella immunceller reagerar efter vaccination. De sekundära utfallsmåtten i denna studie är kritiska för ökad förståelse för immunförsvaret och kan i senare skede relateras tillbaka till det primära utfallsmåttet.

## 5. Studiedesign och Procedur

### 5.1. Övergripande studiedesign

Denna studie är en longitudinell fas IV studie med syfte att förstå om det mänskliga immunförsvaret regleras via en antikroppsberoende feedback. Studien kommer studera eventuella skillnader mellan de personer som genomgått Covid 19 infektion och de som inte genomgått Covid 19 efter de fått en vaccination mot Covid 19.

Studien är en multicenterstudie där protokoll för uppföljning kommer skilja sig åt mellan de olika studiesiten, se stycke 5.2.2 Uppföljande besök efter Covid-19 vaccination samt studiens flödesschema. Personer med genomgången Covid-19-infektion, kommer att erbjudas att delta i vaccinstudien.

Studien genomförs i Region Västerbotten, Region Örebro län, Region Sörmland, Region Värmland, och Region Västmanland.

Vaccination genomförs enligt de rutiner som finns inom respektive region och av respektive regions personal. Vaccinationen styrs inte av studieprotokollet utan kommer ges enligt nationella och regionala samordningen för Covid 19 vaccination.

Rational: En ökad förståelse för hur individer med tidigare Covid 19 reagerar på vaccination är av stort allmänintresse, då resultat kan informera myndigheter om relevanta vaccinbesparande åtgärder. Studien är också designad för att få djupare kunskap om vårt immunförsvaret och hur det reagerar på infektion och vaccination.

Forskningspersoner som deltar i studien kommer följas upp i 4 år efter given vaccinationsdos.

### 5.2. Procedurer och flödesschema

Studien inkluderar forskningspersoner som vaccineras mot Covid- 19 enligt regionernas vaccinationsprogram för Covid-19.

Efter att skriftlig information och samtycke inhämtats utförs provtagning av nollprov. Provtagningen kan utföras i samband med vaccination men kan ske upp till 7 dagar före vaccination eller direkt före eller efter vaccination. Provtagning planeras till dag 1-2 och/eller dag 7-8 efter en första vaccindosen. Efter andra dosen av vaccin planeras provtagning till dag 1-2 och/eller dag 7-8 efter vaccinering. Beroende på frågeställning kommer detta provtagningsschema varieras där vissa provtagningstillfällen utesluts.

Uppföljningsprovtagning planeras också 3 mån, 6 mån och sedan årsvis i fyra år efter första dosen vaccin.

Studiekod: CoVacc  
Version Nr: 1.1  
Datum: 2021-03-02  
EudraCT Nr: 2021-000683-30

### 5.2.1. Inklusion och 0 provtagning:

Inklusion kommer ske i samband med regionens planerade vaccination mot Covid-19. Forskningspersonen informeras om studien av ansvarig prövare eller sjuksköterska och erbjudas deltagande i provtagning. Provtagning utförs innan eller i direkt anslutning till regionens Covid 19 vaccinationstillfälle samt uppföljande provtagning enligt studiens flödesschema. Om forskningspersonen önskar delta signeras samtycke att delta i studien och blodprov samt bakgrundsinformation samlas in (ex. samsjuklighet och läkemedelshistoria). Forskningspersonen kommer också få besvara några frågor om nuvarande hälsotillstånd.

### 5.2.2. Uppföljande besök efter Covid-19 vaccination

Uppföljande besök med provtagning kan ske enligt protokoll A, B eller C (se nedan och flödesschema)

I samband med uppföljningen 3 månader efter första dosen vaccin - protokoll A, respektive enligt protokoll B, provtagningstillfällena 7 dagar efter varje vaccindos får forskningspersonen även besvara korta frågor om eventuella biverkningar.

**Protokoll A:** blodprovstagning före eller i direkt anslutning till första vaccinationstillfälle och sedan uppföljning 3 mån, 6 mån, 1 år, 2 år, 3 år och 4 år efter sista planerade vaccinationstillfälle. (Alla sites)

**Protokoll B:** Som A men med ytterligare blodprovstagning 7-10 dagar efter första vaccindos, vid administration av en andra dos samt 7-10 dagar efter andra dos samt 1 månad efter sista planerade vaccinationstillfället. (Umeå, Örebro)

**Protokoll C:** Som A men med ytterligare blodprovstagning 1-2 dagar och 7-10 dagar efter första vaccindos, vid administration av en andra dos samt 1-2 dagar, 7-10 dagar och 14-20 dagar efter andra dos. (Umeå, Örebro)

Tillägg till dessa protokoll är att en subgrupp (i Umeå och Örebro) kommer att tillfrågas att avge salivprov respektive nasofarynxprov med jämna mellanrum för att studera förekomst av virus och immunsvaret i slemhinnor, samt att personer som får sjukdomssymptom liknande Covid 19 också kommer tillfrågas att avge salivprov

### 5.2.3. Besök 3 månader efter första vaccindos:

3 månaders besök utförs på alla studiesite. Vid detta besök utförs följande

- 3 månaders provtagning
- Enkät
- Insamling av uppgift om allvarlig biverkan efter vaccineringen.

Studiekod: CoVacc  
 Version Nr: 1.1  
 Datum: 2021-03-02  
 EudraCT Nr: 2021-000683-30

#### 5.2.4. Besök uppföljning 6 månader till 4 år efter första vaccindos.

6 månaders uppföljning samt uppföljning 1 år, 2 år, 3 år och 4 år efter första vaccindos utförs på alla studiesite. Vid dessa besök utförs följande:

- Provtagning enligt protokollet

Om den vaccinerade individen får symtom som liknar Covid-19 ombeds hen att lämna ett salivprov och/eller nässvabb.

Om boosterdos vaccin blir aktuellt under åren för uppföljning (6 mån - 4 år) kan ny provtagning upprepas enligt flödesschema dag 1 till 3 månad

#### Flödesschema

| Procedurer                                                           | Inklusion och dag vaccin dos 1 | Dag 1-2 efter dos 1 | Dag 7-10 efter dos 1 | Dag vaccin dos 2 | Dag 1-2 efter dos 2 | Dag 7-10 efter dos 2 | Dag 14-20 efter dos 2 | 1 månad efter sista dos | 3 mån efter sista dos | 6 mån efter sista dos | 1 år efter sista dos | 2 år | 3 år | 4 år |
|----------------------------------------------------------------------|--------------------------------|---------------------|----------------------|------------------|---------------------|----------------------|-----------------------|-------------------------|-----------------------|-----------------------|----------------------|------|------|------|
| <i>Inkl/exklusionskriterier</i>                                      | √                              |                     |                      |                  |                     |                      |                       |                         |                       |                       |                      |      |      |      |
| <i>Informerat samtycke</i>                                           | √                              |                     |                      |                  |                     |                      |                       |                         |                       |                       |                      |      |      |      |
| <i>Sjukdomshistoria /aktuell medicinering</i>                        | √                              |                     |                      |                  |                     |                      |                       |                         |                       |                       |                      |      |      |      |
| <i>Provtagning enligt protokoll A<br/>Alla site</i>                  | √                              |                     |                      |                  |                     |                      |                       |                         | √                     | √                     | √                    | √    | √    | √    |
| <i>Provtagning enligt protokoll B<br/>Studiesite Umeå, Örebro</i>    | √                              |                     | √                    | √                |                     | √                    |                       | √                       | √                     | √                     | √                    | √    | √    | √    |
| <i>Provtagning enligt protokoll C<br/>Studiesite Umeå och Örebro</i> | √                              | √                   | √                    | √                | √                   | √                    | √                     |                         | √                     | √                     | √                    | √    | √    | √    |

Studiekod: CoVacc  
 Version Nr: 1.1  
 Datum: 2021-03-02  
 EudraCT Nr: 2021-000683-30

| Procedurer                              | Inklusion och dag vaccin dos 1 | Dag 1-2 efter dos 1 | Dag 7-10 efter dos 1 | Dag vaccin dos 2 | Dag 1-2 efter dos 2 | Dag 7-10 efter dos 2 | Dag 14-20 efter dos 2 | 1 månad efter sista dos | 3 mån efter sista dos | 6 mån efter sista dos | 1 år efter sista dos | 2 år | 3 år | 4 år |
|-----------------------------------------|--------------------------------|---------------------|----------------------|------------------|---------------------|----------------------|-----------------------|-------------------------|-----------------------|-----------------------|----------------------|------|------|------|
| Vaccination enligt nationell samordning | √                              |                     |                      | √                |                     |                      |                       |                         |                       |                       |                      |      |      |      |
| Ogynnsamma händelser (AE & SUSAR)       |                                |                     | √**                  |                  |                     | √**                  |                       |                         | √*                    |                       |                      |      |      |      |
| Studien avslutas                        |                                |                     |                      |                  |                     |                      |                       |                         |                       |                       |                      |      |      | √    |

\* Protokoll A, B och C

\*\* Protokoll B och C

### 5.3. Biologiska provtagningsförfaranden

#### 5.3.1. Hantering, lagring och destruktion av biologiska prover

Primärt planeras venösa blodprov vid varje provtagningsstillfälle men i vissa fall kan självprovtagning i hemmet ske genom kapillär blodprovstagning genomföras.

**Reducerad blodprovstagning:** Vi ämnar även provta ett större antal personer genom reducerad provtagning. Detta innefattar reduktion både i antal prov men också att bara serumprover tas. Rational för inklusion av denna grupp är att öka antal individer för statistiskt underlag över lång tid.

**Kontroll av virusbärarskap:** I en subgrupp av medverkande individer kommer detektion av virus från övre luftvägar att ske via egenprovtagning i hemmet. Dessa individer kommer tillfrågas om att provta sig upprepat samt vid symptom för att kartlägga skyddseffekt avseende bärarskap av virus.

**Uppföljning och kontroll:** De vaccinerade forskningspersonerna kommer att följas upp med återbesök och blodprovstagning enligt flödesschemat för blodprovstagning ovan. Tidsåtgången för återbesöken beräknas i normalfallet till 15 minuter. Om den vaccinerade individen får symptom som liknar covid-19 ombeds hen att lämna ett salivprov och/eller nässvabb.

#### 5.3.2. Total volym blod per forskningsperson

Uppemot 40 ml blod tas vid varje provtagningsstillfälle. Förutom provtagning enligt protokoll kan extra provtagning komma att utföras.

Studiekod: CoVacc  
Version Nr: 1.1  
Datum: 2021-03-02  
EudraCT Nr: 2021-000683-30

Kapillär provtagning i hemmet kan bli aktuell för en subgrupp av forskningspersoner för att mäta antikroppar vid uppföljning enligt protokoll A.

En subgrupp av forskningspersoner kommer erbjudas att medverka för detektion av virus från övre luftvägar via egenprovtagning i hemmet.

**Covid 19 provtagning** sker ifall individ rapporterar sjukdomssymptom som liknar de som infaller vid Covid 19

### 5.3.3. Biobank

Alla prover som tas i denna studie registreras i en biobank hos Biobank Norr 472, Örebro Biobank 454, Biobank Sörmland 872, Värmland Biobank 924 och Västmanland bakteriologi/virologi 84 och hanteras enligt gällande biobankslag och regelverk. Proverna koddas/pseudonymiseras för att skydda forskningspersonens identifiering. Alla prover och identifieringslistan/kodlista förvaras säkert och separat för att förhindra att obehöriga personer har tillgång till dessa.

### 5.4. Studieavslut

Studien avslutas då den sista forskningspersonen genomfört sista uppföljningen. Beslut om studieavslut i förtid tas av sponsor.

## 6. Urval av forskningspersoner

De personer som kommer att inkluderas är vuxna studieindivider  $\geq 18$  år som vaccinerats mot SARS-CoV-2. Detta sker huvudsakligen vid själva vaccinationen som utförs av regionen enligt nationella riktlinjer.

Personer som ingår i redan pågående kliniska studier av covid-19 och som uppfyller inklusionskriterier samt ej uppfyller något exklusionskriterie kommer även att tillfrågas om medverkan i CoVacc studien.

Annonsering kan komma att utföras och rekrytering sker sedan vid, eller innan det av regionerna planerade vaccinationstillfällena.

### 6.1. Inklusionskriterier

För att inkluderas i studien måste deltagaren uppfylla följande kriterier:

- Forskningspersonen har gett sitt skriftliga samtycke till att delta i studien.
- Ålder  $\geq 18$  år

### 6.2. Exklusionskriterier

Deltagare får inte inkluderas i studien om något av följande kriterier är uppfyllda:

- Ålder  $< 18$  år
- Beslutsoförmögna personer

Studiekod: CoVacc  
Version Nr: 1.1  
Datum: 2021-03-02  
EudraCT Nr: 2021-000683-30

- Kontraindikation till vaccination
- Svår sjukdom
- Pågående läkemedelsbehandling som bedömes påverka vaccinsvaret

### 6.3. Screening

Att forskningspersoner uppfyller alla inklusionskriterier och inte har några exklusionskriterier fastställs innan inkludering.

### 6.4. Avbrottskriterier

Forskningspersonen kan avbryta sitt deltagande i studien när som helst utan att detta medför några som helst konsekvenser för hans/hennes fortsatta behandling. Prövare/sponsor kan när som helst avsluta studien för en forskningsperson p.g.a. att forskningspersonen inte följer procedurerna i studieprotokollet.

## 7. Prövningsläkemedel

### 7.1. Beskrivning av prövningsläkemedel

Studien studerar immunsvaret efter vaccination mot Covid-19. Samtliga forskningspersoner kommer att erhålla aktivt vaccin mot Covid-19. För närvarande finns tre godkända vacciner Comirnaty BNT162b2 (Pfizer), Modernas mRNA-1273 samt AstraZeneca som kan komma att ges till forskningspersonerna enligt nationella och regionala riktlinjer samt utifrån vaccintillgång. Under studiens gång kan ytterligare vaccin mot covid-19 tillkomma och därigenom ingå i studien.

### 7.2. Dos och administreringsätt

Dosering är inget som styrs i studien utan sker enligt av läkemedelsverket godkänd dosering för varje enskilt vaccin som också är fastställt i det nationella vaccinationsprogrammet. Samtliga godkända vacciner kan ingå i denna studie. Vilket vaccin som den enskilde forskningspersonen erhåller beror på vilket vaccin som är rekommenderat för denna grupp och finns tillgängligt.

### 7.3. Packning, märkning, och hantering av prövningsläkemedel

Prövningsläkemedel märks eller förpackas inte för speciellt studien utan hanteras enligt instruktioner från tillverkarna samt ansvariga för vaccinationen mot Covid-19. Vaccin erhålls och förvaras enligt specifik produkts instruktion.

### 7.4. Spårbarhet och följsamhet till behandling

Samtliga personer som erhåller vaccin kommer i anslutning till vaccinationstillfället att efter skriftlig och muntlig information få signera ett samtycke. Enligt nationella riktlinjer kommer även alla vaccinerade att registreras i det nationella vaccinationsregistret. Typen av vaccin mot covid-19 kommer att registreras i studiens Case Report Form (CRF).

Studiekod: CoVacc  
Version Nr: 1.1  
Datum: 2021-03-02  
EudraCT Nr: 2021-000683-30

## 7.5. Samtidig användning av andra läkemedel

Läkemedel som anses nödvändiga för forskningspersonens säkerhet och välbefinnande kan ges efter provarnas bedömning, om annat inte specificeras i exklusionskriterierna. Samtidig medicinering kommer att registreras i Case Report Form (CRF).

## 7.6. Behandling efter studiens slut

Ingen behandling kommer att ske efter studiens slut. Forskningspersonerna kommer att erhålla information om antikropps-nivån 1 år efter vaccinationen.

# 8. Metoder för mätning av utfallsmått för klinisk effekt och säkerhet

## 8.1. Metoder för mätning av utfallsmått för klinisk effekt och säkerhet

Det primära utfallsmåttet är att undersöka nivån av specifika antikroppar mot SARS-CoV-2 protein årligen upp till 4 år efter vaccination. Studien använder sig av ELISA metod för att mäta dessa antikroppar.

Vid uppföljande besök efter vaccination efterfrågas eventuella biverkningar av vaccineringen och dessa noteras i eCRF.

### 8.1.1. Primärt utfallsmått (variabel)

Det primära utfallsmåttet är att undersöka nivån av specifika antikroppar mot SARS-CoV-2 protein årligen upp till fyra år efter vaccination.

### 8.1.2. Sekundära utfallsmått (variabler)

Sekundära utfallsmått är analyser för att utreda hur det mänskliga immunförsvaret reagerar vid Covid 19-vaccin.

# 9. Hantering av ogynnsamma medicinska händelser

Denna studie ämnar följa personer som får vaccination mot Covid-19 enligt det nationella vaccinationsprogrammet. Vaccinationen kommer inte hanteras av studiepersonal utan av regionernas personal.

Studien kommer lista eventuella misstänkta allvarlig oförutsedda biverkningar (SUSAR). Detta kommer utföras genom att vid uppföljning 3 månader efter första dosen Covid 19 vaccination – protokoll A, respektive för deltagare i protokoll B, provtagningstillfällena 7 dagar efter varje vaccindos kommer studiepersonal tillfråga forskningspersonen om eventuella biverkningar efter vaccinationen.

Studiekod: CoVacc  
Version Nr: 1.1  
Datum: 2021-03-02  
EudraCT Nr: 2021-000683-30

Om personen varit sjukhusvårdad eller haft annan allvarlig händelse kommer detta bedömas och i de fall händelsen kan anses vara en misstänkt allvarlig oförutsedd biverkan (SUSAR) kommer det följas upp med hjälp av journalutskrifter från vårdtillfället.

I de fall händelsen bedöms vara en SUSAR kommer ansvarig studieläkare försäkra sig om att denna händelse är rapporterad av sjukvården alternativt själv rapportera händelsen som en SUSAR i studien.

De händelser som rapporterats av regionen som en SUSAR kommer listas i studien men inte rapporteras till myndigheter eftersom det då blir en dubbelrapportering.

## 9.1. Definitioner

### 9.1.1. Incident (Adverse Event, AE)

Varje incident (AE), ogynnsam medicinsk händelse, eller försämring av ett existerande medicinskt tillstånd hos en forskningsperson som fått ett prövningsläkemedel, oavsett om det har orsakssamband med behandlingen eller inte, d.v.s. kan vara ett ogynnsamt och oönskat tecken (inklusive ett onormalt laboratoriefynd), symptom eller sjukdom som tidsmässigt är förknippat med användning av ett prövningsläkemedel, oavsett om det är relaterat till prövningsläkemedlet eller inte.

### 9.1.2. Biverkning (Adverse Reaction, AR)

Vid klinisk användning innan ett nytt läkemedel fått godkännande eller innan dess nya användningsområden godkänts, och särskilt då den terapeutiska dosen inte kan fastställas bör all skadlig och oavsiktlig reaktion på ett läkemedel oavsett dos anses vara biverkningar AR (Adverse Reaction). Frasen "reaktion" på ett läkemedel innebär att ett orsakssamband mellan ett läkemedel och en biverkning är åtminstone en rimlig möjlighet, det vill säga att förhållandet inte kan uteslutas.

### 9.1.3. Allvarlig incident (Serious Adverse Event, SAE)

SAE: Varje allvarlig incident som vid någon dos

- resulterar i död
- är livshotande
- föranleder sjukhusvistelse eller förlängd sjukhusvistelse
- orsakar bestående eller betydande invaliditet eller funktionsnedsättning
- resulterar i en medfödd skada/missbildning

Medicinsk och vetenskaplig bedömning bör utföras för att bestämma om en händelse är "allvarlig" och om det skulle föranleda att rapporteras i andra situationer, till exempel viktiga medicinska händelser som kanske inte är direkt livshotande eller resulterar i dödsfall eller sjukhusvistelse, men kan äventyra forskningspersonen eller kan kräva ingrepp för att förhindra ett av de andra resultaten som anges i definitionen ovan. Dessa bör också normalt betraktas som SAEs.



Studiekod: CoVacc  
Version Nr: 1.1  
Datum: 2021-03-02  
EudraCT Nr: 2021-000683-30

#### 9.1.4. Misstänkt allvarlig oföretsedd biverkning (SUSAR)

SUSAR: En biverkning/händelse som är allvarlig, oföretsedd och misstänks vara orsakad av behandlingen, d.v.s. biverkningar som inte finns med i prövarhandboken (Investigator's Brochure - IB) eller produktresumén.

### 9.2. Bedömning av potentiella SUSAR

#### 9.2.1. Bedömning av orsakssamband

Prövaren på respektive studiesite ansvarar för att avgöra om en händelse kan anses vara en misstänkt allvarlig oföretsedd biverkan (SUSAR). I bedömningen anges samtidigt om det finns ett orsakssamband mellan händelsen och användningen av Covid vaccinationen.

Alla händelser ska kategoriseras antingen som troligen relaterade, möjligen relaterade, osannolikt relaterade eller inte relaterade enligt definitionen nedan:

**Troligen relaterad** Klinisk händelse, inklusive onormala svar från laboratorieanalyser, som uppträder inom rimlig tid efter administrering av interventionen/prövningsläkemedlet. Osannolikt att händelsen kan hänföras till underliggande sjukdom eller andra läkemedel utan den är mest sannolikt orsakat av prövningsläkemedlet och uppkomsten är rimlig i samband med användningen av prövningsläkemedlet.

**Möjligen relaterad:** Klinisk händelse, inklusive onormala svar från laboratorieanalyser, som uppträder inom rimlig tid efter administrering av interventionen/prövningsläkemedlet. Händelsen kan förklaras av prövningsläkemedlet och uppkomsten är rimlig i samband med användningen av prövningsläkemedlet, men det finns inte tillräcklig information för att fastställa sambandet. Händelsen kan förklaras av underliggande sjukdom eller andra läkemedel.

**Osannolikt relaterad:** Händelsen är osannolikt relaterad till interventionen/prövningsläkemedlet och kan förklaras av andra läkemedel eller underliggande sjukdom.

**Inte relaterad:** Klinisk händelse, inklusive onormala svar från laboratorieanalyser, men som inte är rimlig i förhållande till användningen av interventionen/prövningsläkemedlet.

#### 9.2.2. Bedömning av intensitet

Varje incident ska klassificeras av prövaren som mild, måttlig eller uttalad.

**Mild:** Händelsen är relativt mild och övergående i naturen men påverkar inte forskningspersonens normala liv.

**Måttlig:** Händelsen orsakar försämring av funktion men påverkar inte hälsan. Händelsen kan vara tillräckligt obehaglig och störa normala aktiviteter men hindrar dem inte helt.

**Uttalad:** Händelsen orsakar försämring av funktion eller arbetsförmåga eller utgör en hälsorisk för forskningspersonen.

Studiekod: CoVacc  
Version Nr: 1.1  
Datum: 2021-03-02  
EudraCT Nr: 2021-000683-30

### 9.2.3. Bedömning av svårighetsgrad

Prövaren ansvarar för att bedöma svårighetsgraden (allvarlig eller icke-allvarlig). Om incidenten bedöms som allvarlig ska detta registreras i studiens eCRF.

## 9.3. Rapportering av incidenter

I samband med uppföljningen 3 månader efter första dosen vaccin - protokoll A, respektive för deltagare i protokoll B, provtagningstillfällena 7 dagar efter varje vaccindos kommer studiepersonal tillfråga forskningspersonen om eventuella biverkningar efter vaccination mot Covid-19.

Listning av incidenter görs av prövaren direkt i eCRF/pCRF. Som minimum beskrivs händelsen och en orsakssambandsbedömning utförs.

### 9.3.1. Listning av incidenter (AE)

Alla AE kommer listas i CRF men kommer inte rapporteras. I samband med uppföljningen 3 månader efter första dosen vaccin - protokoll A, respektive för deltagare i protokoll B, provtagningstillfällena 7 dagar efter varje vaccindos kommer forskningspersonen även tillfrågas om eventuella biverkningar.

### 9.3.2. Rapportering av allvarliga incidenter (SAE)

Allvarliga incidenter, (SAE) rapporteras till sponsor inom 24 timmar från att prövaren fått kännedom om SAE. För redan kända biverkningar för respektive vaccin rapporteras inte till sponsor utan listas enbart i eCRF.

Uppföljande information som beskriver utfall och hantering av SAE rapporteras så fort den informationen finns tillgänglig.

### 9.3.3. Registrering och rapportering av allvarliga incidenter (SUSAR)

Denna studie ämnar följa personer som i klinisk vård får vaccination mot Covid-19. Vaccinationen kommer inte hanteras av studiepersonal utan av regionernas personal.

Allvarliga incidenter som inträffar efter vaccination kommer i prövningen att insamlas vid 3 månaders uppföljningen i studien. I de fall en händelse bedöms vara en SUSAR kommer ansvarig studieläkare försäkra sig om att denna händelse är rapporterad av sjukvården som en biverkan enligt LVFS: 2012:14,19§.

Identifierade allvarliga incidenter som av sponsor bedöms vara SUSAR och som inte sedan tidigare rapporterats av regionerna kommer rapporteras löpande till Läkemedelverket av sponsor.

SUSARs, som är dödliga eller livshotande rapporteras snarast möjligt och senast inom 7 dagar efter att det inträffade har blivit känt för sponsor. Relevanta uppföljande uppgifter sänds därefter in inom ytterligare 8 dagar. Övriga SUSAR rapporteras snarast möjligt och senast inom 15 dagar efter de kommit till sponsors kännedom. Information om SUSAR som inträffar under prövningen sammanställs av sponsor och förmedlas till samtliga prövare i studien.

Studiekod: CoVacc  
Version Nr: 1.1  
Datum: 2021-03-02  
EudraCT Nr: 2021-000683-30

## 9.4. Årlig säkerhetsrapport (Development Safety Update Report, DSUR)

En årlig säkerhetsrapport skickas till LäkeMedelsverket och Överklagandenämnden för etikprövning. I säkerhetsrapporten listas inträffade allvarliga händelser definierade som SUSAR. SUSAR har inte rapporterats via studien utan via regionernas ordinarie rapporteringsväg för allvarliga biverkningar. En sammanfattande bedömning av säkerhetsläget görs för forskningspersonerna samt en nytta/riskvärdering för studien.

## 9.5. Referenssäkerhetsinformation

Produktresumé för godkänt vaccin kommer att användas som referenssäkerhetsinformation för att bedöma om en incident är förväntad eller inte. Eftersom val av vaccin inte styrs av studien kan olika vaccins produktresuméer bli aktuellt.

# 10. Statistik

Det saknas kunskap för att uppskatta det långvariga immunsvaret efter vaccination. I den unika situation som är här vi därför i det närmaste ett obefintligt underlag för att göra en traditionell statistisk powerberäkning. Det beror också på faktorer som ligger utanför vår kontroll att bestämma vilket covid-19 vaccin som ges, och om individer kommer välja att ta vaccin. Vår ansats tar höjd för både att inte alla väljer att fullfölja vaccineringen och för att vi kan behöva rekrytera olika kontrollgrupper på basis av olika vaccinstrategier som bestäms med kort varsel.

Vi planerar för att inkludera totalt upp till 3000 individer. Av dessa förväntas majoriteten genomgå reducerad provtagning. För att studera långtidsimmuniteten, kommer vi att undersöka nivån av specifika antikroppar mot SARS-CoV-2 årligen, upp till fyra år efter vaccination. För frågeställningar 2 och 3 uppskattar vi antalet individer till ca 500.

## 10.1. Statistisk analys

### 10.1.1. Statistisk metod

Nivå av antikroppar mot SARS-CoV-2 S är en kraftigt positivt skev variabel. En detaljerad deskriptiv analys kommer genomföras där decentiler av variabel av antikropps nivåer presenteras, stratifierat på individer tidigare infekterade/ej tidigare infekterade med SARS-CoV-2. Den primära frågeställningen kommer att analyseras med Mann-Whitney U-test.

### 10.1.2. Bortfall

Bortfallsanalys av forskningspersoner som valt att avbryta sitt deltagande i studien kommer att genomföras. Den primära analysen kommer att genomföras på dem individer som kvarstår i studien. Multipel imputation av värden på individer som valt att avbrutit deltagande sedan senaste mättillfället kommer att genomföras som en sensitivetsanalys, om tillgängligt data bedöms tillräcklig för att sådan analys kan göras med god validitet.

## 10.2. Justering av signifikans och konfidensintervall

Detta är i grund och botten är en observationsstudie där individer inom det ordinarie vaccinationsprogrammet följs och publicering av resultat kommer att ske löpande under

Studiekod: CoVacc  
Version Nr: 1.1  
Datum: 2021-03-02  
EudraCT Nr: 2021-000683-30

uppföljning. Justering av signifikansnivå för dom multipla testtillfällena kommer inte att göras, då ett naturligt sätt att justera över de olika publikationerna kommer vara svår att motivera. Eventuell ökning av risk av statistiska typ 1-fel allteftersom resultat från studien ackumuleras kommer diskuteras i respektive publicerad artikel.

### 10.3. Dimensionsberäkning

Det råder av naturliga skäl stor osäkerhet kring läge och spridning i nivån av antikroppar mot SARS-CoV-2 S efter upp till fyra års uppföljning. Eftersom antikropps-nivån mäts på en kontinuerlig skala där spridningen i antikropps-nivå förväntas öka med tiden kommer troligtvis behovet av antal forskningspersoner för att nå minst 80% power öka med uppföljningstiden. Studien kommer därför att anta en adaptiv ansats gällande dimensionering. Inledningsvis planeras 3000 forskningspersoner att inkluderas. Interimsanalyser kommer att genomföras årligen i upp till tre år, skulle beräkningar i dessa visa att kommande analyser av uppföljningar riskerar att bli underdimensionerade finns möjlighet att annonsera för rekrytering av nya forskningspersoner.

### 10.4. Interimsanalys

Planerade interimsanalyser kommer genomföras årsvis i upp till tre år med huvudsakligt syfte att utvärdera spridning i data för möjliggörande av uppdatering av studiens dimensionering. Eftersom dessa utvärderingar är icke-jämförande och därför inte påverkar error rate i hypotesprövningar kommer inte justering för detta att genomföras.

## 11. Kvalitetskontroll och kvalitetssäkring

### 11.1. Kvalitetssäkring och sponsors övervakning

Det är prövarens ansvar att CRF granskas för fullständighet och noggrannhet och att lämpliga CRF-sidor också är signerade och daterade. Det är också prövarens ansvar att säkerställa efterlevnad av ICH-GCP och alla tillämpliga lagkrav. Tillsynsmyndigheter kan genomföra en myndighetsinspektion av denna prövning. Sådana granskningar / inspektioner kan inträffa när som helst under eller efter avslutad prövning.

### 11.2. Monitorering

För att säkerställa att studien genomförs enligt protokollet, att data samlas in, dokumenteras och rapporteras enligt ICH-GCP samt gällande etiska- och regulatoriska krav, kommer studien att monitoreras av en oberoende monitor innan studien påbörjas, under studiens gång samt efter det att studien avslutats. Monitoreringen utförs enligt studiens monitoreringsplan och syftar till att säkerställa att forskningspersonernas rättigheter, säkerhet och välbefinnande tillgodoses samt att data i CRF är ifyllda, korrekta och överensstämmer med källdata.

Eftersom vaccinationen inte är en del av studien kommer monitoreringen att utföras på distans med hjälp av videomöten med studiepersonal på de olika sidorna. Studien planerar en förenklad monitorering detta då studien inte ansvarar för vaccinationen mot Covid 19. Trots

Studiekod: CoVacc  
Version Nr: 1.1  
Datum: 2021-03-02  
EudraCT Nr: 2021-000683-30

att ansvaret för säkerhet kring Covid 19 vaccinationen vilar på regionerna kommer studiepersonal att fråga upp om biverkningar och allvarliga händelser. SUSAR kommer i de fall det inte är inrapporterat till myndigheter rapporteras in av studiepersonal.

### 11.3. Källdata

Prövaren måste behålla källdokument för varje forskningsperson i studien. Ett dokument över vad som klassificerats som källdata i studien ska finnas i prövarpärmen (Investigator Site File, ISF). Prövaren måste se till att alla källdokument är tillgängliga för monitorering och annan kvalitetskontroll.

Källdata definieras före studiestart på varje enskilt provningsställe (site).

### 11.4. Avvikelse eller allvarliga överträdelser

Överträdelser och avvikelser från provningsprotokoll, GCP och andra regelverk som på ett signifikant sätt direkt påverkar, eller med stor sannolikhet skulle påverka, forskningspersoner i Sverige eller provningens vetenskapliga värde ska omgående rapporteras inom 7 dagar (från kännedom) till LV. Det är sponsorns ansvar att bedöma konsekvenserna av inträffade avvikelser, och därmed också besluta om LV ska informeras.

Mindre avvikelser som inte påverkar forskningspersonernas integritet eller säkerhet, eller signifikant påverkar provningens vetenskapliga värde dokumenteras i provningsdokumentationen hos huvudprövare och hos sponsorn.

### 11.5. Audit och inspektioner

Auktoriserade representanter för sponsorn och behöriga myndigheter kan utföra audit eller inspektioner på provningsstället, inklusive källdataverifiering. Prövaren ska se till att alla källdokument är tillgängliga för audit och inspektion. Syftet med en audit eller inspektion är att systematiskt och oberoende granska alla studierelaterade aktiviteter och dokument, för att avgöra om dessa aktiviteter utfördes, registrerades, analyserades och rapporterades korrekt enligt protokollet, Good Clinical Practice (GCP) och tillämpliga regelverk.

## 12. Etik

### 12.1. Följsamhet till protokollet, GCP och regelverket

Studien kommer att genomföras enligt protokoll, Helsingforsdeklarationen, ICH-GCP (god klinisk sed), och de gällande nationella och internationella regelverk som berör denna kliniska studie. Detta för att säkerställa forskningspersonernas säkerhet och integritet liksom kvalitén på data som samlas in.

### 12.2. Etikprövning av studien

En ansökan till Etikprövningsmyndigheten har godkänts, Dnr 2021-00055.

Det slutgiltiga studieprotokollet för läkemedelsprövningar måste, som en del i ansökan om tillstånd till klinisk läkemedelsprövning, godkännas av både Etikprövningsmyndigheten och

Studiekod: CoVacc  
Version Nr: 1.1  
Datum: 2021-03-02  
EudraCT Nr: 2021-000683-30

Läkemedelsverket, innan prövningen får genomföras. Den slutgiltiga versionen av informerat samtyckesformulär och annan information som ges till forskningspersonerna ska godkännas eller ges ett skriftligt positivt yttrande av etikprövningsmyndigheten. Etikprövningsmyndigheten och Läkemedelsverket ska informeras om eventuella ändringar av protokollet i enlighet med gällande krav.

### 12.3. Procedur för inhämtande av informerat samtycke

Huvudprövaren vid varje provningsställe ska säkerställa och delegera till läkare eller sjuksköterska att forskningspersonen ges full och adekvat muntlig och skriftlig information om studien, dess syfte, eventuella risker och fördelar samt inklusion-/exklusionskriterier. Forskningspersoner måste också meddelas att de är fria att avbryta sitt deltagande i studien när som helst utan att behöva meddela orsak.

Forskningspersonen ska ges möjlighet att ställa frågor och tillåtas tid att överväga den information som lämnats. Om personen väljer att delta så signerar forskningspersonen och prövaren eller sjuksköterskan samtycket.

En kopia av forskningspersonsinformation samt det signerade samtycket lämnas till forskningspersonen. En procedur med elektroniskt samtycke kan bli aktuellt senare under studiens gång om en teknisk lösning för detta kan skapas som uppfyller de regulatoriska kraven. Forskningspersonens signerade och daterade informerade samtycke måste erhållas innan man utför någon studiespecifik aktivitet i studien. Varje forskningsperson som deltar i studien kommer att identifieras med ett forskningspersonnummer på en forskningspersonsidentifikationslista. Forskningspersonen samtycker till att monitorer, auditörer och inspektörer får tillgång till deras journal och övrig källdata. Om ny information tillkommer i studien så har forskningspersonen rätt att åter ta ställning till om han/hon vill fortsätta sitt deltagande.

### 12.4. Dataskydd

Om någon del av databehandlingen utförs av någon annan organisation, inom eller utanför EU, så kommer lämpliga avtal och/eller annan dokumentation upprättas, för att säkerställa att bearbetningen genomförs i enlighet med bestämmelser i dataskyddsförordningen och andra relevanta lagstiftningar, innan någon dataöverföring sker.

Det informerade samtyckesformulärets innehåll överensstämmer med relevant integritets och dataskyddslagstiftning. I forskningspersonsinformation och det informerade samtyckesformuläret kommer forskningspersonerna att ges fullständig information om hur insamling, användning och offentliggörande av deras studieuppgifter kommer att ske.

Forskningspersonsinformation och det informerade samtyckesformuläret kommer att förklara hur studieuppgifter lagras för att upprätthålla sekretess i enlighet med nationell datalagstiftning. Insamlad data kommer lagras i eCRF REDCap på Umeå Universitets lokala säkra servrar. Studiens eCRF är bara tillgängligt för studiepersonal och kräver tvåfaktors-autentisering för inloggning. Alla uppgifter som bearbetas av sponsorn kommer att vara pseudonymiserade och identifieras med Studiekod/Studie ID/Initialer.

Studiekod: CoVacc  
Version Nr: 1.1  
Datum: 2021-03-02  
EudraCT Nr: 2021-000683-30

Det informerade samtyckesformuläret kommer också att förklara att för verifiering av data kan auktoriserade representanter för sponsorn, samt relevant myndighet, kräva tillgång till delar av sjukhus- eller studiejournaler som är relevanta för studien, inklusive forskningspersonens medicinska historia.

## 12.5. Försäkringar

Forskningspersonerna är försäkrade genom patientskadeförsäkringen samt läkemedelsförsäkringen för aktuellt erhållet covid-19 vaccin.

## 13. Väsentlig ändring av studien

Väsentliga ändringar av det undertecknade protokollet är endast möjliga genom godkända protokolltillägg (amendments) och enligt överenskommelse från alla ansvariga personer. Uppgifter om icke-väsentliga ändringar ska tydligt noteras i det ändrade protokollet.

I den händelse att väsentliga ändringar av protokollet (t.ex. ändring av huvudsyftet, primära eller sekundära variabler, metod att mäta primärvariabel, ändring av provningsläkemedel eller dosering) kommer att göras under studiens gång så ska godkännande från Etikprövningsmyndigheten samt Läkemedelsverket inhämtas innan ändringarna implementeras. En ändring som berör ett nytt provningsställe, ny provare och eller en ny forskningspersonsinformation ska endast godkännas av Etikprövningsmyndigheten.

Icke väsentliga ändringar ska registreras och föras in i dokumentationen när den sedan lämnas in, till exempel i eventuell efterföljande anmälan av en väsentlig ändring eller i samband med inrapportering av End of Trial.

## 14. Insamling, hantering och arkivering av data

Forskningspersoner som deltar i studien kodalas med specifika forskningspersonnummer. Alla forskningspersoner registreras på en forskningspersonsidentifikationslista som kopplar samman forskningspersonens namn och personnummer med ett forskningspersonnummer.

All data ska registreras, hanteras och lagras på ett sätt som möjliggör en korrekt rapportering, tolkning och verifiering. Kompletta provrörmått, samt källdokument kommer att arkiveras i minst 10 år efter att studien är avslutad. Källdata i patientjournalssystem förvaras och arkiveras enligt respektive sjukhusregions bestämmelser.

Forskningsperson som vaccineras mot Covid-19 inom upptagningsområden för Region Örebro län, Region Sörmland, Region Värmland, Region Västmanland och Region Västerbotten kommer att erbjudas att vara med i studien. Information om forskningspersonernas samsjuklighet, läkemedelshistoria samt aktuella hälsotillstånd kommer att insamlas och sparas i en elektronisk databas.

Varje forskningsperson erhåller en kod. Kodnyckeln förvaras i ett låst brandsäkert skåp i respektive infektionskliniks lokaler. Endast studieläkare och studiesköterska har tillgång till kodnyckeln. För sammanhållen analys av data både pseudonymiserad klinisk och

Studiekod: CoVacc  
Version Nr: 1.1  
Datum: 2021-03-02  
EudraCT Nr: 2021-000683-30

laboratoriedata kommer databas att inrättas vid Umeå Universitets med multifaktor auktoriseringsprotokoll. Dessa lagringsmedia säkerhetskopieras regelbundet och är skyddade för obehörigas användning, bearbetning och stöld. Uppgifterna kommer att bevaras så länge forskningsprojektet pågår, och minst 10 år efter att de sista resultaten publicerats från forskningsprojektet.

För att kunna bidra till bredare kunskap kring vaccin-inducerade immunsvår kommer aidentifierad klinisk metadata kopplad till laboratoriedata att skickas för analys till tredje part. För att säkerställa vetenskaplig redlighet kommer data kopplat till pseudonymiserat (kodat) klinisk data att kunna granskas och användas av andra forskare i framtiden. Om forskningspersonen väljer att återta sitt samtycke kommer ingen mer information att samlas in, men den information som redan föreligger kommer att användas i studien.

#### 14.1. Case Report Form (Forskningspersonsformulär)

Ett elektroniskt Case Report Form (eCRF) används för datainsamling. I studien kommer eCRF REDCap att användas. Prövaren ska se till att uppgifterna registreras och att eventuella korrigeringar i CRF sker enligt vad som anges i studieprotokollet och i enlighet med instruktionerna. Prövaren ska säkerställa att de registrerade uppgifterna är korrekta, fullständiga och att rapportering sker enligt de tidslinjer som förutbestämts. Prövaren signerar det avslutade CRFet. En kopia av avslutat CRF kommer att arkiveras på prövningsstället.

### 15. Meddelande att studien är avslutad, rapportering och publicering

Senast 90 dagar efter studiens avslutande ska Läkemedelsverket informeras genom att "Declaration of End of Trial Notification" skickas in.

Inom ett år efter avslutad studie analyseras resultaten, en klinisk studierapport med individdata utarbetas och studieresultaten rapporteras även in till EudraCT-databasen.

### 16. Referenser

1. Strohmeier S, Simon V, Aberg J, Reich DL, Krammer F, Cordon-Cardo C. Robust neutralizing antibodies to SARS-CoV-2 infection persist for months. *Science*. 2020 Dec 4;370(6521):1227-1230. doi: 10.1126/science.abd7728. Epub 2020 Oct 28. PMID: 33115920; PMCID: PMC7810037.
2. Florian Krammer, Komal Srivastava, the PARIS team, Viviana Simon. Robust spike antibody responses and increased reactogenicity in seropositive individuals after a single dose of SARS-CoV-2 mRNA vaccine  
doi: <https://doi.org/10.1101/2021.01.29.21250653>
3. Saman Saadat, Zahra Rikhtegaran-Tehrani, James Logue, Michelle Newman, Matthew B Frieman, Anthony D. Harris, Mohammad M. Sajadi Single Dose Vaccination in Healthcare Workers Previously Infected with SARS-CoV-2. medRxiv 2021.01.30.21250843;



Studiekod: CoVacc  
Version Nr: 1.1  
Datum: 2021-03-02  
EudraCT Nr: 2021-000683-30

doi: <https://doi.org/10.1101/2021.01.30.21250843>

## Summary of changes – CoVacc EudraCT 2021-000683-30

### v1.2 2021-03-19

- Sections 5.2.3 & 5.2.4 that follow-up visits are counted from the last vaccine dose
- Sampling time-frames are extended in Flowchart under section 5.2.4
- Supplement in paragraph 6: the exclusion criterion “Ongoing drug treatment that is judged to significantly affect the vaccine response (does not include inhaled steroids and nasal sprays).
- Clarification that data collection applies to AE / SAE (not only side effect) in section 5.2.3 and section 9.
- Clarification in paragraph 9 that potential SUSAR is reported to the sponsor

### v1.3 2021-03-29

- Contact information: Chief examiner for Umeå changed to Johan Normark instead of Clas Ahlm.
- Section 5.2.2: Clarification that the study subject, in case of disease symptoms similar to Covid-19, is asked to submit samples according to the region's routine for Covid-19 sampling.
- Adjustment in the protocol that follow-up 3 months, 6 months, 1 year, 2 years, 3 years and 4 years is calculated based on the last planned vaccination time.
- Section 6.2 Exclusion criteria: Severe illness is clarified by addition of text: “which is judged to affect the research person's ability to complete the study”, Ongoing drug treatment that is considered to significantly affect the vaccine response. Clarification that a tablet cortisone  $\leq 15\text{mg} / \text{day}$  is not an exclusion criterion. Addition: “does not include inhaled steroids and nasal spray, and tablet cortisone  $\leq 15\text{mg} / \text{day}$ ”.
- Section 9.3: Clarification for listing of AE. The minimum event and date are described, a causal assessment is made for the SAE.

### v1.4 2021-04-13

- 5.2.2: Addition of Protocol D - As protocol A but with additional blood sampling 7-10 days after the last planned vaccination time and 1 month after the last planned vaccination time. Applies to Umeå. Study subjects belonging to protocol D are asked about any AE / SAE 7-10 days after the last vaccination and 3 months after the last vaccination.
- 5.2.3 Questionnaire removed from text. This is not the case.
- 5.2.4 - Flow chart has been updated with information about protocol D
- Paragraph 9 - Handling of adverse medical events, has been updated with information about study subjects belonging to protocol D and on what occasions they are asked about any AE / SAE.

### v1.5 2021-04-29

- 5.2.2: Addition of Protocol E - As Protocol A, but sampling is not performed in connection with the first vaccine dose but only in connection with the second planned vaccination occasion. Sampling is also performed 1 month after the last planned vaccination. Study subjects belonging to protocol E are asked about any AE / SAE 7-10 days after the last vaccination and 1 month and 3 months after the last vaccination.
- 5.2.4: Flow chart has been updated with information about protocol E
- Paragraph 9: Handling of adverse medical events, has been updated with information about study subjects belonging to protocol E and on what occasions they are asked about any AE / SAE.

### v1.6 2021-05-28

- 5.2.2, 5.2.3 and 5.2.4: Addition of Protocol F - Sampling 4-6 weeks after the last vaccine dose, study subjects belonging to protocol F are asked about any AE / SAE 4-6 weeks after the last vaccine dose.
- 5.2.4: Flow chart has been updated with information about protocol F
- 6.2: Addition of information that Rituximab does not constitute an exclusion criterion.
- 7.5: Addition of information that patients with MS and Rituximab treatment can be included in the study after individual assessment.
- Paragraph 9: Handling of adverse medical events, has been updated with information about study subjects belonging to protocol F and on what occasions they are asked about any AE / SAE.

# Statistical plan – CoVacc EudraCT 2021-000683-30

## Original statistical plan

### Statistics

There is insufficient knowledge to estimate the long-term immune response after vaccination. In this unique situation, we have almost no basis for calculating a traditional statistical power. Factors beyond our control determine which COVID-19 vaccine is given and whether individuals will choose to take the vaccine. We are taking a liberal approach both because not everyone chooses to follow through with the vaccination and because we may need to recruit different control groups on the basis of different vaccine strategies that are determined at short notice.

We plan to include up to 3,000 individuals. Of these, the majority are expected to undergo reduced sampling. To study long-term immunity, we will examine the level of specific antibodies to SARS-CoV-2 annually for up to four years after vaccination. For objectives 2 and 3, we estimate the number of individuals at about 500.

### Statistical analyses

#### ○ Statistical methods

The level of antibodies to SARS-CoV-2 S is a strongly positive skewed variable. A detailed descriptive analysis will be performed in which deciles of variable antibody levels are presented, stratified by individuals previously infected/not previously infected with SARS-CoV-2. The primary objective will be analyzed using the Mann-Whitney U-test.

#### ○ Drop-outs

We will conduct a drop-out analysis of subjects who have chosen to discontinue their participation in the study. The primary analysis will be performed on the individuals who remain in the study. Multiple imputation of values for individuals who have chosen to discontinue participation since the last measurement will be performed as a sensitivity analysis, if available data is deemed sufficient for good validity of such an analysis.

#### ○ Adjustment of significance and confidence interval

This is basically an observational study where individuals within the regular vaccination program are followed and results will be published on an ongoing basis during follow-up. Adjustment of significance level for the multiple test occasions will not be done since it is difficult to justify adjusting across the various publications in a natural way. Any increase in the risk of statistical type 1 errors detected as the study accumulates data will be discussed in the relevant published article.

#### ○ Sample size calculations

For obvious reasons, there is great uncertainty about the status and variation of antibody levels to SARS-CoV-2 S after up to four years of follow-up. Since antibody levels are measured on a continuous scale where the variation of the antibody levels are expected to increase over time, the need for the number of subjects to reach at least 80% power will probably increase with the follow-up time. The study will therefore take an adaptive approach regarding sizing. Initially, the study plans to include 3,000 subjects. Interim analyses will be conducted annually for up to three years. If these show that future analyses of follow-ups risk being too small, there is an opportunity to advertise to recruit new subjects.

#### ○ Interim analysis

Planned interim analyses will be conducted annually for up to three years primarily to evaluate data distribution to allow updating of the sample size. As these evaluations are non-comparative and therefore do not affect the error rate in hypothesis tests, no adjustment for this will be made.

### No changes has been made to the original statistical plan

## **CoVacc**

### **Immunsvär vid vaccination mot Covid-19, en öppen multicenter fas IV studie**

---

Studiekod: CoVacc

EudraCT nummer: 2021-000683-30

Versionsnummer: 1.6

Datum: 2021-05-28

Sponsor/Koordinerande  
prövare: Clas Ahlm,  
Titel Professor, överläkare

---

Studiekod: CoVacc  
Version Nr: 1.6  
Datum: 2021-05-28  
EudraCT Nr: 2021-000683-30

## Innehåll

|                                                                          |    |
|--------------------------------------------------------------------------|----|
| Signatursida .....                                                       | 5  |
| Kontaktuppgifter .....                                                   | 7  |
| Lista över använda akronymer och förkortningar .....                     | 9  |
| 1. Synopsis .....                                                        | 10 |
| 2. Bakgrundsinformation och rational .....                               | 12 |
| 3. Nytt-Risk värdering.....                                              | 13 |
| 4. Syfte .....                                                           | 14 |
| 4.1. Primär frågeställning .....                                         | 14 |
| 4.2. Sekundär frågeställningar .....                                     | 14 |
| 4.3. Primärt utfallsmått (variabel).....                                 | 14 |
| 4.4. Sekundära utfallsmått (variabler) .....                             | 15 |
| 5. Studiedesign och Procedur.....                                        | 15 |
| 5.1. Övergripande studiedesign .....                                     | 15 |
| 5.2. Procedurer och flödesschema.....                                    | 15 |
| 5.2.1. Inklusion och 0 provtagning: .....                                | 16 |
| 5.2.2. Uppföljande besök efter Covid-19 vaccination.....                 | 16 |
| 5.2.3. Besök 3 månader efter sista vaccindos: .....                      | 17 |
| 5.2.4. Besök uppföljning 6 månader till 4 år efter sista vaccindos. .... | 17 |
| 5.3. Biologiska provtagningsförfaranden .....                            | 18 |
| 5.3.1. Hantering, lagring och destruktion av biologiska prover.....      | 18 |
| 5.3.2. Total volym blod per forskningsperson.....                        | 19 |
| 5.3.3. Biobank .....                                                     | 19 |
| 5.4. Studieavslut.....                                                   | 19 |
| 6. Urval av forskningspersoner .....                                     | 19 |
| 6.1. Inklusionskriterier.....                                            | 20 |
| 6.2. Exklusionskriterier .....                                           | 20 |
| 6.3. Screening.....                                                      | 20 |
| 6.4. Avbrottskriterier.....                                              | 20 |
| 7. Prövningsläkemedel.....                                               | 20 |

Studiekod: CoVacc  
Version Nr: 1.6  
Datum: 2021-05-28  
EudraCT Nr: 2021-000683-30

|         |                                                                          |    |
|---------|--------------------------------------------------------------------------|----|
| 7.1.    | Beskrivning av prövningsläkemedel .....                                  | 20 |
| 7.2.    | Dos och administreringsätt.....                                          | 21 |
| 7.3.    | Packning, märkning, och hantering av prövningsläkemedel.....             | 21 |
| 7.4.    | Spårbarhet och följsamhet till behandling.....                           | 21 |
| 7.5.    | Samtidig användning av andra läkemedel.....                              | 21 |
| 7.6.    | Behandling efter studiens slut.....                                      | 21 |
| 8.      | Metoder för mätning av utfallsmått för klinisk effekt och säkerhet ..... | 21 |
| 8.1.    | Metoder för mätning av utfallsmått för klinisk effekt och säkerhet ..... | 21 |
| 8.1.1.  | Primärt utfallsmått (variabel).....                                      | 22 |
| 8.1.2.  | Sekundära utfallsmått (variabler).....                                   | 22 |
| 9.      | Hantering av ogynnsamma medicinska händelser.....                        | 22 |
| 9.1.    | Definitioner .....                                                       | 22 |
| 9.1.1.  | Incident (Adverse Event, AE).....                                        | 22 |
| 9.1.2.  | Biverkning (Adverse Reaction, AR).....                                   | 22 |
| 9.1.3.  | Allvarlig incident (Serious Adverse Event, SAE).....                     | 23 |
| 9.1.4.  | Misstänkt allvarlig oförutsedd biverkning (SUSAR).....                   | 23 |
| 9.2.    | Bedömning av potentiella SUSAR .....                                     | 23 |
| 9.2.1.  | Bedömning av orsakssamband.....                                          | 23 |
| 9.2.2.  | Bedömning av intensitet .....                                            | 24 |
| 9.2.3.  | Bedömning av svårighetsgrad .....                                        | 24 |
| 9.3.    | Rapportering av incidenter .....                                         | 24 |
| 9.3.1.  | Listning av incidenter (AE) .....                                        | 24 |
| 9.3.2.  | Rapportering av allvarliga incidenter (SAE).....                         | 24 |
| 9.3.3.  | Registrering och rapportering av allvarliga incidenter (SUSAR).....      | 25 |
| 9.4.    | Årlig säkerhetsrapport (Development Safety Update Report, DSUR).....     | 25 |
| 9.5.    | Referenssäkerhetsinformation.....                                        | 25 |
| 10.     | Statistik.....                                                           | 25 |
| 10.1.   | Statistisk analys .....                                                  | 26 |
| 10.1.1. | Statistisk metod.....                                                    | 26 |
| 10.1.2. | Bortfall .....                                                           | 26 |
| 10.2.   | Justering av signifikans och konfidensintervall .....                    | 26 |
| 10.3.   | Dimensionsberäkning .....                                                | 26 |

Studiekod: CoVacc  
Version Nr: 1.6  
Datum: 2021-05-28  
EudraCT Nr: 2021-000683-30

|                                                                           |    |
|---------------------------------------------------------------------------|----|
| 10.4. Interimsanalys.....                                                 | 26 |
| 11. Kvalitetskontroll och kvalitetssäkring.....                           | 27 |
| 11.1. Kvalitetssäkring och sponsors övervakning.....                      | 27 |
| 11.2. Monitorering.....                                                   | 27 |
| 11.3. Källdata.....                                                       | 27 |
| 11.4. Avvikelser eller allvarliga överträdelser.....                      | 27 |
| 11.5. Audit och inspektioner.....                                         | 28 |
| 12. Etik.....                                                             | 28 |
| 12.1. Följsamhet till protokollet, GCP och regelverket.....               | 28 |
| 12.2. Etikprövning av studien.....                                        | 28 |
| 12.3. Procedur för inhämtande av informerat samtycke.....                 | 28 |
| 12.4. Dataskydd.....                                                      | 29 |
| 12.5. Försäkringar.....                                                   | 29 |
| 13. Väsentlig ändring av studien.....                                     | 29 |
| 14. Insamling, hantering och arkivering av data.....                      | 30 |
| 14.1. Case Report Form (Forskningspersonsformulär).....                   | 30 |
| 15. Meddelande att studien är avslutad, rapportering och publicering..... | 31 |
| 16. Referenser.....                                                       | 31 |

Studiekod: CoVacc  
Version Nr: 1.6  
Datum: 2021-05-28  
EudraCT Nr: 2021-000683-30

## Signatursida

### **Sponsor/Koordinerande prövare**

Jag har ansvar för att det här protokollet innehåller alla essentiella delar för att genomföra studien. Jag kommer att delge protokollet och all annan viktig studierelaterad information till ansvariga prövare för att de ska kunna genomföra studien på rätt sätt. Jag är medveten om mitt ansvar att hålla de medarbetare som arbetar med studien informerade och utbildade.

Genom min underskrift godkänner jag att genomföra studien enligt detta protokoll, Helsingforsdeklarationen, ICH GCP (god klinisk sed) och de gällande nationella och internationella regelverk som berör denna kliniska studie.

Jag kommer att delge protokollet och all annan viktig studierelaterad information till de medarbetare och prövare som medverkar i studien, för att de ska kunna utföra studien på rätt sätt. Jag är medveten om mitt ansvar att kontinuerligt hålla medarbetare och prövare som arbetar med studien informerade och utbildade.

Jag är medveten om att kvalitetskontroll kommer att ske av studien i form av monitorering, audit och eventuell inspektion.

Sponsors/Koordinerande prövares signatur

Datum

---

---

Clas Ahlm



Studiekod: CoVacc  
Version Nr: 1.6  
Datum: 2021-05-28  
EudraCT Nr: 2021-000683-30

## Huvudprövare

Jag har läst detta protokoll och bedömt att det innehåller alla essentiella delar för att genomföra studien. Genom min underskrift godkänner jag att genomföra studien enligt detta protokoll, Helsingforsdeklarationen, ICH GCP (god klinisk sed) och de gällande nationella och internationella regelverk som berör denna kliniska studie.

Jag kommer att delge protokollet och all annan viktig studierelaterad information till de medarbetare och prövare som medverkar i studien, för att de ska kunna utföra studien på rätt sätt. Jag är medveten om mitt ansvar att kontinuerligt hålla medarbetare och prövare som arbetar med studien informerade och utbildade.

Jag är medveten om att kvalitetskontroll kommer att ske av studien i form av monitorering, audit och eventuell inspektion.

Huvudprövares signatur

Datum

---

---

Signatur

---

Namnförtydligande

Studiekod: CoVacc  
 Version Nr: 1.6  
 Datum: 2021-05-28  
 EudraCT Nr: 2021-000683-30

## Kontaktuppgifter

|                                                    |                                                                                                                                                                                                                           |
|----------------------------------------------------|---------------------------------------------------------------------------------------------------------------------------------------------------------------------------------------------------------------------------|
| <b>Ansvarsroll i studien</b>                       |                                                                                                                                                                                                                           |
| <b>Sponsor/Koordinerande prövare Umeå</b>          | Clas Ahlm, professor, överläkare<br>Institutionen för klinisk mikrobiologi<br>Umeå universitet<br>070-317 29 65<br>clas.ahlm@umu.se                                                                                       |
| <b>Forskningshuvudman</b>                          | Umeå Universitet                                                                                                                                                                                                          |
| <b>Koordinerade monitororganisation</b>            | KFC, Region Västerbotten                                                                                                                                                                                                  |
| <b>Styrgrupp</b>                                   | Mattias Forsell, docent<br>Clas Ahlm, professor, överläkare<br>Johan Normark, docent, överläkare<br>Sara Cajander, PhD, överläkare                                                                                        |
| <b>Studiesite Umeå</b><br>Principal Investigator   | Johan Normark<br>Infektionskliniken, Norrlands<br>Universitetssjukhus<br>901 85 Umeå<br>Tel: 070-2258959<br>e-mail: johan.normark@umu.se                                                                                  |
| <b>Studiesite Örebro</b><br>Principal Investigator | Anja Rosdahl, Infektionsspecialist<br>Infektionskliniken, Örebro Universitetssjukhus,<br>Region Örebro Län, Södra Grev Rosengatan,<br>701 85 Örebro<br>telefon: +46 19-6021157<br>e-mail: anja.rosdahl@regionorebrolan.se |

Studiekod: CoVacc  
Version Nr: 1.6  
Datum: 2021-05-28  
EudraCT Nr: 2021-000683-30

| <b>Ansvarsroll i studien</b>                               |                                                                                                                                                                                                          |
|------------------------------------------------------------|----------------------------------------------------------------------------------------------------------------------------------------------------------------------------------------------------------|
| <b>Studiesite Västerås</b><br><br>Principal Investigator   | Emeli Månsson, överläkare<br>Infektionskliniken<br>Västmanlands sjukhus, Sigtunagatan<br>721 89 Västerås<br>Tel. 021-173765<br><br>e-mail: emeli.mansson@regionvastmanland.se                            |
| <b>Studiesite Karlstad</b><br><br>Principal Investigator   | Staffan Tevell, överläkare, MLA,<br>Infektionskliniken<br>Centralsjukhuset Karlstad<br>Rosenborgsgatan 2,<br>651 85 Karlstad<br><br>Tel: 010-831 50 00 (vxl)<br>e-mail: staffan.tevell@regionvarmland.se |
| <b>Studiesite Eskilstuna</b><br><br>Principal Investigator | Markus Kalén, överläkare<br>Infektionskliniken<br>Kungsvägen 42,<br>633 49 Eskilstuna<br><br>Tel: 016-10 30 00 (vxl)<br>e-mail: markus.kalen@regionsormland.se                                           |
| <b>Studiesite Östersund</b><br><br>Principal Investigator  | Micael Widerström<br>Infektionskliniken<br>Östersunds sjukhus<br>83183 Östersund<br><br>Tel: 063-15 30 00 (vxl)<br>e-mail: micael.widerstrom@umu.se                                                      |

Studiekod: CoVacc  
 Version Nr: 1.6  
 Datum: 2021-05-28  
 EudraCT Nr: 2021-000683-30

## Lista över använda akronymer och förkortningar

| Förkortning | Förklaring                                                                                                                                        |
|-------------|---------------------------------------------------------------------------------------------------------------------------------------------------|
| AE          | Adverse Event = Incident, Ogynnsam medicinsk händelse                                                                                             |
| AR          | Adverse Reaction = Biverkning, d.v.s. varje ogynnsam och oavsedd reaktion på ett prövningsläkemedel, oavsett dos.                                 |
| CRF         | Case Report Form = Datainsamlingsformulär                                                                                                         |
| eCRF        | Elektroniskt Case Report Form – Elektroniskt datainsamlingsformulär                                                                               |
| DSUR        | Development Safety Update Report = Årlig säkerhetsrapport                                                                                         |
| ELISA       | Enzyme-Linked ImmunoSorbent Assay                                                                                                                 |
| GCP         | Good Clinical Practice                                                                                                                            |
| ICH         | International Council for Harmonisation                                                                                                           |
| ITT         | Intention-to-treat = Inkluderar alla data från alla forskningspersoner som deltagit i studien                                                     |
| LV          | Läkemedelsverket                                                                                                                                  |
| LVFS        | Läkemedelverkets författningssamling                                                                                                              |
| mRNA        | messenger/budbärar Ribonukleinsyra                                                                                                                |
| PP          | Per Protokoll analys = Inkluderar endast data från forskningspersoner som genomfört studien helt enligt protokoll, utan några protokollavvikelser |
| REDCap      | Research Electronic Data Capture                                                                                                                  |
| SAE / SAR   | Serious Adverse Event / Serious Adverse Reaction= Allvarlig incident eller biverkning                                                             |
| SARS-CoV-2  | Severe Acute Respiratory Syndrome Corona virus 2                                                                                                  |
| SUSAR       | Suspected Unexpected Serious Adverse Reaction = Misstänkt, allvarlig oförutsedd biverkning                                                        |

Studiekod: CoVacc  
Version Nr: 1.6  
Datum: 2021-05-28  
EudraCT Nr: 2021-000683-30

## 1. Synopsis

|                             |                                                                                                                                                                                                                                                                                                                                                                                                                                                                                                                                                                                                                                                                                                                                                                                                                                                                                                                                                                                                                                                                                                                                                                                                                                                                                                                                                                                                                                    |
|-----------------------------|------------------------------------------------------------------------------------------------------------------------------------------------------------------------------------------------------------------------------------------------------------------------------------------------------------------------------------------------------------------------------------------------------------------------------------------------------------------------------------------------------------------------------------------------------------------------------------------------------------------------------------------------------------------------------------------------------------------------------------------------------------------------------------------------------------------------------------------------------------------------------------------------------------------------------------------------------------------------------------------------------------------------------------------------------------------------------------------------------------------------------------------------------------------------------------------------------------------------------------------------------------------------------------------------------------------------------------------------------------------------------------------------------------------------------------|
| EudraCT nummer:             | 2021-000683-30                                                                                                                                                                                                                                                                                                                                                                                                                                                                                                                                                                                                                                                                                                                                                                                                                                                                                                                                                                                                                                                                                                                                                                                                                                                                                                                                                                                                                     |
| Titel:                      | CoVacc Immunsvaret vid vaccination mot Covid-19                                                                                                                                                                                                                                                                                                                                                                                                                                                                                                                                                                                                                                                                                                                                                                                                                                                                                                                                                                                                                                                                                                                                                                                                                                                                                                                                                                                    |
| Studiekod:                  | CoVacc                                                                                                                                                                                                                                                                                                                                                                                                                                                                                                                                                                                                                                                                                                                                                                                                                                                                                                                                                                                                                                                                                                                                                                                                                                                                                                                                                                                                                             |
| Kort bakgrund/<br>Rational: | <p>I världen pågår fortfarande en pandemi med coronaviruset SARS-CoV-2. Man vet idag betydligt mer om de faktorer som samspelar i interaktionen mellan människa och viruset än då pandemin startade. Covid-19 orsakar framförallt en lungskada under den akuta sjukdomsfasen men kan även orsaka skador i andra organ såsom njurar, lever och centrala nervsystemet (hjärnan) där kognitiv påverkan, smak-och luktbortfall kan vara tidiga symtom. Kunskap saknas i nuläget om immunitetens duration och kvarstående T-cells immunitet efter genomgången sjukdom och hur vaccination påverkar immunitet hos individer med genomgången infektion jämfört med Covid-19 naiva individer.</p> <p>För närvarande har successivt nya behandlingsmetoder förbättrat prognosen hos svårt sjuka patienter. Nya vacciner har utvecklats på rekordtid mot Covid-19. Det finns av naturliga skäl inga långtidsdata vad gäller vaccinets effektivitet eller kvaliteten på immunsvaret över tid vilket denna studie kommer att analysera. Dessutom kommer vi att få kunskap om hur människan utvecklar immunsvaret mot viruset samt även hur människans förmåga att aktivera immunsvaret samverkar med vacciner då individen utvecklar en skyddande immunitet. Förhoppningsvis kan sådan förståelse även bidra till förbättrad design av både själva vaccinerna och de vaccinationsprogram som implementeras nationellt och internationellt.</p> |
| Syfte:                      | <p><b>Syfte:</b> Att studera immunsvaret efter vaccination mot covid-19.</p> <p><b>Primär frågeställning:</b> Hur bildas antikroppar mot SARS-CoV-2 efter vaccination av individer som tidigare haft covid-19 i jämförelse med personer som ej haft Covid-19?</p> <p><b>Sekundära frågeställning:</b></p>                                                                                                                                                                                                                                                                                                                                                                                                                                                                                                                                                                                                                                                                                                                                                                                                                                                                                                                                                                                                                                                                                                                          |

Studiekod: CoVacc  
 Version Nr: 1.6  
 Datum: 2021-05-28  
 EudraCT Nr: 2021-000683-30

|                                               |                                                                                                                                                                                                                                                                                                                                                    |
|-----------------------------------------------|----------------------------------------------------------------------------------------------------------------------------------------------------------------------------------------------------------------------------------------------------------------------------------------------------------------------------------------------------|
|                                               | <ul style="list-style-type: none"> <li>• Hur god är immuniteten 1 år efter vaccination i dessa två grupper.</li> <li>• Hur påverkar initial aktivering av medfödd immunitet det adaptiva immunsvaret med fokus på primär frågeställning?</li> </ul>                                                                                                |
| Studiedesign:                                 | Öppen, Multicenter, Fas IV                                                                                                                                                                                                                                                                                                                         |
| Studiepopulation:                             | Naiva och tidigare SARS-CoV-2- exponerade individer                                                                                                                                                                                                                                                                                                |
| Antal forskningspersoner:                     | 3000                                                                                                                                                                                                                                                                                                                                               |
| Inklusionskriterier:                          | <ul style="list-style-type: none"> <li>• Samtycker till deltagande i studien</li> <li>• Ålder ≥ 18 år</li> </ul>                                                                                                                                                                                                                                   |
| Exklusionskriterier:                          | <ul style="list-style-type: none"> <li>• Ålder &lt;18 år</li> <li>• Beslutsförmögna personer</li> <li>• Kontraindikation till vaccination</li> <li>• Svår sjukdom</li> <li>• Pågående läkemedelsbehandling som bedömes påverka vaccinsvaret</li> </ul>                                                                                             |
| Prövningsläkemedel, dosering, administrering: | <p>Covid-19 vaccin som är marknadsgodkänt i Sverige, ges intramuskulärt.</p> <p>Administration och dosering sker enligt godkännande för respektive covid-19 vaccin.</p> <p>Vaccinationen sker inom det nationella vaccinationsprogrammet och enligt Folkhälsomyndighetens prioritering och riktlinjer och administreras av regionens personal.</p> |
| Effektutvärdering:                            | <p><b>Primärt utfallsmått</b> (variabel): Nivå av antikroppar mot SARS-CoV-2 S protein årligen upp till fyra år efter vaccination</p> <p><b>Sekundärt utfallsmått</b> (variabler): Analyser för att utreda hur det mänskliga immunförsvaret reagerar vid Covid 19-vaccin.</p>                                                                      |
| Studieperiod:                                 | Q1/Q2 2021 – Q1/Q2 2025                                                                                                                                                                                                                                                                                                                            |

Studiekod: CoVacc  
Version Nr: 1.6  
Datum: 2021-05-28  
EudraCT Nr: 2021-000683-30

## 2. Bakgrundsinformation och rational

Den pågående pandemin med coronaviruset SARS-CoV-2 har medfört ökade kunskaper om de faktorer som samspelar i interaktionen mellan människa och viruset. Covid-19 orsakar framförallt en direkt virusorsakad lungskada under den akuta sjukdomsfasen. Viruset orsakar även skador i andra organ såsom njurar, lever och centrala nervsystemet (hjärnan) där kognitiv påverkan, smak-och luktbortfall kan vara tidiga symtom. Kunskap saknas i nuläget om immunitetens duration och kvarstående T-cells immunitet efter genomgången sjukdom och hur vaccination påverkar immunitet hos individer med genomgången infektion jämfört med Covid-19 naiva individer. Mätbara neutraliserande antikroppar kvarstår minst 5-6 månader efter covid-19 infektion (1) medan det är mindre känt hur länge och starkt B- och T-cells minnet finns kvar efter en naturlig infektion. Preliminära data visar att de som haft Covid-19 svarar med tydligt antikropsvar redan efter en första dos av mRNA vaccin (2,3).

För närvarande har successivt nya behandlingsmetoder förbättrat prognosen hos svårt sjuka patienter. Nya vacciner har utvecklats på rekordtid mot Covid-19. Det finns av naturliga skäl inga långtidsdata vad gäller vaccinets effektivitet eller kvaliteten på immunsvaret över tid vilket denna studie kommer att analysera. Dessutom kommer vi att få kunskap om hur människan utvecklar immunitet mot viruset samt även hur människans förmåga att aktivera inflammatoriska och genetiska system som samverkar med vacciner då individen utvecklar skyddande immunitet. Förhoppningsvis kan sådan förståelse även bidra till förbättrad design av både själva vaccinerna och de vaccinationsprogram som implementeras nationellt och internationellt.

I ett större perspektiv kan man tänka sig att de resultat som framkommer i studien kommer att resultera i ny kunskap om både hur framtida vaccinationer bör genomföras, vilka individer som bör vaccineras, och med hur många doser. Detta kan bidra till en mer effektiv och individualiserad vaccination.

Med anledning av detta kommer vi här generera detaljerad information om hur immunsvaret mot Covid-19-vaccination utvecklas och hur antikropsvar bibehålls över tid både i individer som haft jämfört med de som inte haft tidigare infektion med SARS-CoV-2. För detta ändamål kommer vi att studera vaccininducerat svar i en stor multicenterkohort av väl karakteriserade Covid-19-diagnostiserade individer jämfört med vaccinerade individer som är SARS-CoV-2 naiva. På så sätt har vi möjlighet att jämföra immunsvaret vid infektion med den som sker efter Covid 19-vaccination på cellulär, molekylär och genetisk nivå.

Vår strategi är noggrant utformad för att ge information av högsta intresse för det svenska vaccinationsprogrammet och gör det möjligt för oss att ta itu med välkända kunskapsluckor inom immunologi: Ändrar befintlig immunitet epitopspecifika vaccininducerade svar och vilka medfödda signaler som utlöser immunsvaret som företrädesvis riktar sig mot neutraliserande epitoper?

Vacciner kommer att erbjudas till den vuxna befolkningen i Sverige för att bekämpa den nuvarande SARS-CoV-2-pandemin. Denna studie ger en unik möjlighet att besvara de primära och sekundära frågeställningar vi har.

Studiekod: CoVacc  
Version Nr: 1.6  
Datum: 2021-05-28  
EudraCT Nr: 2021-000683-30

### 3. Nytt-Risk värdering

I denna studie kommer vi utföra extra blodprovstagning på individer som vaccineras mot Covid-19. Vaccinationen kommer följa klinisk rutin och den nationella samordningen kring Covid 19 vaccination i Sverige. Då regionerna inte styr över vilka vaccinsorter som distribueras kommer studien använda sig av de vaccinsorter som för tillfället är tillgängligt.

**Risker:** Riskbedömning för vaccination har tidigare genomförts av läkemedelsverket vid godkännande av de vaccin som nu används för att vaccinera mot covid-19.

Vaccinationen kommer utföras av regionen enligt den nationella samordningen kring Covid 19 vaccination. Sedan tidigare beskrivna biverkningar för respektive vaccinsort är att förvänta vid dessa vaccinationer. Risken för oväntade biverkningar av dessa läkemedel anses som mycket små.

Vid blodprovstagning i studien kan forskningspersonen uppleva viss smärta eller obehag men denna bedöms som försumbar. Covid 19 provtagning med näsprov kan upplevas som obehagligt.

**Steg för att minimera riskerna för forskningspersoner:** Forskningspersonen kommer följas upp enligt studieprotokoll där eventuella oväntade eller allvarliga bieffekter kommer registreras. Forskningspersonen kommer informeras om studien och provtagningen och kommer också ges möjlighet att fundera över sitt deltagande och om eventuella obehag eller smärta är acceptabla. Forskningspersonen kan också när som helst och utan att ange orsak avsluta sitt deltagande i studien.

**Covid-19:** Om Covid-19 pandemin förhindrar forskningspersoner att komma till kliniken enligt fastlagt protokoll kommer prövningen följa klinisk rutin, d.v.s. forskningspersonens besök och skjuts upp enligt klinikens bedömning alternativt kommer uppföljning ske via telefon eller videomöte vilket innebär att all uppföljning och säkerhetsrapportering kommer utföras oavsett hur Covid-19 pandemin kan komma att påverka sjukvården. Skulle en ogynnsam medicinsk händelse kräva sjukvård kommer forskningspersonen omhändertas enligt regionens kliniska rutin då regionen också ansvarar för vaccinationen i studien. Det är deltagaren själv som avgör om denne vill genomgå vaccination.

**Nyttan:** Nyttan med studien är att bättre förstå hur det mänskliga immunförsvaret reagerar på exponering för främmande protein. Informationen vi får genom studien kommer således kunna relateras både till infektion och till vaccination. Målet är att information vi kan samla i denna studie kan bidra till grundläggande kunskap att bättre förstå grundläggande immunologiska mekanismer som kan rationalisera hur olika vaccin kan ges i framtiden för maximal effekt kan avgöra hur intervall på olika vaccin bör utformas för bästa effekt samt ge bättre förståelse för basal reglering av immunsvaret vid infektion och vaccination

Nyttan med den grundläggande immunologiska nyttan kan vara mycket hög och långsiktig, då information kan användas till att designa nya vaccin och vaccinstrategier



Studiekod: CoVacc  
Version Nr: 1.6  
Datum: 2021-05-28  
EudraCT Nr: 2021-000683-30

**Risk/nytta rational:** Vaccinerna mot Covid-19 är prövat i människa och godkänt av svenska Läkemedelsverket. Vaccinationen följer svenska rekommendationer. Dosering följer rekommendationen och det faktum att studier på människa redan är utförda utan då beskrivna allvarliga problem anser vi att riskerna är små för forskningspersonerna som blir vaccinerade enligt regionens vaccinationsprogram.

## 4. Syfte

Vårt primära mål med projektet är att undersöka hur antikroppssvar utvecklas efter Covid-19-vaccination beroende på om man tidigare varit infekterad med SARS-CoV-2 eller inte. Utöver detta syfte ämnar vi klargöra grundläggande immunologiska processer som till stor del är identiska mellan infektion och vaccination; hur expansion av individuella B-cellskloner och immunsvaret i slemhinnor påverkas av tidigare SARS-CoV-2 infektion, samt hur det medfödda immunförsvaret kan påverka vårt adaptiva immunförsvaret efter vaccination. Vi ämnar också isolera och potentiellt sekvensera eventuella virus om en vaccinerad individ ändå blir infekterad med virus.

Sammanfattningsvis, det svenska nationella vaccinationsprogrammet mot Covid-19, i kombination med väl karakteriserade individer med redan existerande immunitet mot Covid-19, utgör ett stort tillfälle att studera hur immunsystemet reagerar på primär eller sekundär antigenutmaning utan förvirrande faktorer för virusreplikation.

Studiens syfte är att generera ny kunskap om hur immunförsvaret reagerar på ny- eller återexponering för proteinantigen.

### 4.1. Primär frågeställning

Vår primära frågeställning är om antikropsutveckling mot SARS-CoV-2 S-protein efter vaccination skiljer sig mellan de som haft tidigare SARS-CoV-2-infektion jämfört Covid-19 naiva individer.

### 4.2. Sekundär frågeställningar

Att bättre förstå hur det mänskliga immunförsvaret reagerar när det blir exponerat för främmande proteinantigen mätt som antikropsnivå i serum, plasma och slemhinna samt på cellulär och genetisk nivå.

De sekundära frågeställningarna är sådana som är generella för att förstå hur det mänskliga immunförsvaret fungerar vid både infektion och vaccination.

### 4.3. Primärt utfallsmått (variabel)

Det primära utfallsmåttet är mätbara bindande antikropsnivåer före och årligen efter vaccination i individer som tidigare varit infekterade med SARS-CoV-2 i jämförelse med antikropsnivåer vid samma tidpunkter i personer som vaccineras mot Covid-19 men inte tidigare varit exponerade för SARS-CoV-2.

Studiekod: CoVacc  
Version Nr: 1.6  
Datum: 2021-05-28  
EudraCT Nr: 2021-000683-30

#### 4.4. Sekundära utfallsmått (variabler)

De sekundära utfallsmåtten inkluderar detaljerade jämförelser av hur individuella immunceller reagerar efter vaccination. De sekundära utfallsmåtten i denna studie är kritiska för ökad förståelse för immunförsvaret och kan i senare skede relateras tillbaka till det primära utfallsmåttet.

## 5. Studiedesign och Procedur

### 5.1. Övergripande studiedesign

Denna studie är en longitudinell fas IV studie med syfte att förstå om det mänskliga immunförsvaret regleras via en antikroppsberoende feedback. Studien kommer studera eventuella skillnader mellan de personer som genomgått Covid 19 infektion och de som inte genomgått Covid 19 efter de fått en vaccination mot Covid 19.

Studien är en multicenterstudie där protokoll för uppföljning kommer skilja sig åt mellan de olika studiesiten, se stycke 5.2.2 Uppföljande besök efter Covid-19 vaccination samt studiens flödesschema. Personer med genomgången Covid-19-infektion, kommer att erbjudas att delta i vaccinstudien.

Studien genomförs i Region Västerbotten, Region Örebro län, Region Sörmland, Region Värmland, och Region Västmanland.

Vaccination genomförs enligt de rutiner som finns inom respektive region och av respektive regions personal. Vaccinationen styrs inte av studieprotokollet utan kommer ges enligt nationella och regionala samordningen för Covid 19 vaccination.

Rational: En ökad förståelse för hur individer med tidigare Covid 19 reagerar på vaccination är av stort allmänintresse, då resultat kan informera myndigheter om relevanta vaccinbesparande åtgärder. Studien är också designad för att få djupare kunskap om vårt immunförsvaret och hur det reagerar på infektion och vaccination.

Forskningspersoner som deltar i studien kommer följas upp i 4 år efter given vaccinationsdos.

### 5.2. Procedurer och flödesschema

Studien inkluderar forskningspersoner som vaccineras mot Covid- 19 enligt regionernas vaccinationsprogram för Covid-19.

Efter att skriftlig information och samtycke inhämtats utförs provtagning av nollprov. Provtagningen kan utföras i samband med vaccination men kan ske upp till 7 dagar före vaccination eller direkt före eller efter vaccination. Provtagning planeras till dag 1-2 och/eller dag 7-10 efter en första vaccindosen. Efter andra dosen av vaccin planeras provtagning till dag 1-2 och/eller dag 7-10 efter vaccinering. Uppföljningsprovtagning planeras också 1 mån, 3 mån, 6 mån och sedan årsvis i fyra år efter sista dosen vaccin. Beroende på frågeställning kommer detta provtagningsschema varieras där vissa provtagningstillfällen utesluts

Studiekod: CoVacc  
Version Nr: 1.6  
Datum: 2021-05-28  
EudraCT Nr: 2021-000683-30

### 5.2.1. Inklusion och 0 provtagning:

Inklusion kommer ske i samband med regionens planerade vaccination mot Covid-19. Forskningspersonen informeras om studien av ansvarig prövare eller sjuksköterska och erbjudas deltagande i provtagning. Provtagning utförs innan eller i direkt anslutning till regionens Covid 19 vaccinationstillfälle samt uppföljande provtagning enligt studiens flödesschema. Om forskningspersonen önskar delta signeras samtycke att delta i studien och blodprov samt bakgrundsinformation samlas in (ex. samsjuklighet och läkemedelshistoria). Forskningspersonen kommer också få besvara några frågor om nuvarande hälsotillstånd.

### 5.2.2. Uppföljande besök efter Covid-19 vaccination

Uppföljande besök med provtagning kan ske enligt protokoll A, B, C, D, E eller F (se nedan och flödesschema)

I samband med uppföljningen 3 månader efter sista planerade dos vaccin får forskningspersonen även besvara korta frågor om eventuella AE/SAE. För protokoll B och C tillfrågas forskningspersonen även vid provtagningstillfällena 7-10 dagar efter varje vaccindos, för protokoll D vid provtagningstillfället 7-10 dagar efter sista planerade vaccindos, för protokoll E vid provtagningstillfälle 7-10 dagar samt 1 månad efter sista planerade vaccindos och för protokoll F vid provtagningstillfälle 4-6 veckor efter sista planerade vaccindos.

**Protokoll A:** blodprovstagning före eller i direkt anslutning till första vaccinationstillfälle och sedan uppföljning 3 mån, 6 mån, 1 år, 2 år, 3 år och 4 år efter sista planerade vaccinationstillfälle. (Alla sites)

**Protokoll B:** Som A men med ytterligare blodprovstagning 7-10 dagar efter första vaccindos, vid administration av en andra dos samt 7-10 dagar efter andra dos samt 1 månad efter sista planerade vaccinationstillfället. (Umeå, Örebro)

**Protokoll C:** Som A men med ytterligare blodprovstagning 1-2 dagar och 7-10 dagar efter första vaccindos, vid administration av en andra dos samt 1-2 dagar, 7-10 dagar och 14-20 dagar efter andra dos. (Umeå, Örebro)

**Protokoll D:** Som A men med ytterligare blodprovstagning 7-10 dagar efter sista planerade vaccinationstillfället samt 1 månad efter sista planerade vaccinationstillfället. (Umeå)

**Protokoll E:** Provtagning före eller i direkt anslutning till andra vaccinationstillfälle och sedan uppföljning 7-10 dagar efter sista planerade vaccinationstillfället samt 1 mån, 3 mån, 6 mån, 1 år, 2 år, 3 år och 4 år efter sista planerade vaccinationstillfället (Umeå med flera).

**Protokoll F:** Provtagning 4-6 veckor efter sista vaccindos samt 1 år, 2 år, 3 år och 4 år efter sista planerade vaccinationstillfälle. (Umeå)

Studiekod: CoVacc  
 Version Nr: 1.6  
 Datum: 2021-05-28  
 EudraCT Nr: 2021-000683-30

Tillägg till dessa protokoll är att en subgrupp (i Umeå och Örebro) kommer att tillfrågas att avge salivprov respektive nasofarynxprov med jämna mellanrum för att studera förekomst av virus och immunsvaret i slemhinnor, personer som får sjukdomssymptom liknande Covid 19 uppmanas lämna prov enligt regionens rutin för Covid 19 provtagning.

### 5.2.3. Besök 3 månader efter sista vaccindos:

3 månaders besök utförs på alla studiesite förutom de som följer Protokoll F. Vid detta besök utförs följande

- 3 månaders provtagning
- Insamling av uppgift om AE/SAE efter vaccineringen.

### 5.2.4. Besök uppföljning 6 månader till 4 år efter sista vaccindos.

6 månaders uppföljning samt uppföljning 1 år, 2 år, 3 år och 4 år efter sista vaccindos utförs på alla studiesite. Studiesite som följer Protokoll F utför inte 6 månadersuppföljningen men årsuppföljningar 1-4 utförs. Vid dessa besök utförs följande:

- Provtagning enligt protokollet

Om den vaccinerade individen får symptom som liknar Covid-19 ombeds hen att lämna ett salivprov och/eller nässvabb.

Om boosterdos vaccin blir aktuellt under åren för uppföljning (6 mån - 4 år) kan ny provtagning upprepas enligt flödesschema dag 1 till 3 månad.

### Flödesschema

| Procedurer                             | Inklusion och dag vaccin dos 1 | Dag 1-2 efter dos 1 | Dag 7-10 efter dos 1 | Dag vaccin dos 2 (samt inklusion protokoll E) | Dag 1-2 efter dos 2 | Dag 7-10 efter dos 2 | Dag 14-20 efter dos 2 | 4-6 veckor efter sista vaccindos | 1 månad efter sista dos ±3 dagar | 3 mån efter sista dos ±14 dagar | 6 mån efter sista dos ±14 dagar | 1 år efter sista dos ±30 dagar | 2 år efter sista dos ±30 dagar | 3 år efter sista dos ±30 dagar | 4 år efter sista dos ±30 dagar |
|----------------------------------------|--------------------------------|---------------------|----------------------|-----------------------------------------------|---------------------|----------------------|-----------------------|----------------------------------|----------------------------------|---------------------------------|---------------------------------|--------------------------------|--------------------------------|--------------------------------|--------------------------------|
| Inkl/exklusions-kriterier              | √                              |                     |                      | √#                                            |                     |                      |                       | √##                              |                                  |                                 |                                 |                                |                                |                                |                                |
| Informerat samtycke                    | √                              |                     |                      | √#                                            |                     |                      |                       | √##                              |                                  |                                 |                                 |                                |                                |                                |                                |
| Sjukdomshistoria/ aktuell medicinering | √                              |                     |                      | √#                                            |                     |                      |                       | √##                              |                                  |                                 |                                 |                                |                                |                                |                                |
| Provtagning enligt protokoll A         | √                              |                     |                      |                                               |                     |                      |                       |                                  |                                  | √                               | √                               | √                              | √                              | √                              | √                              |
| Alla site                              |                                |                     |                      |                                               |                     |                      |                       |                                  |                                  |                                 |                                 |                                |                                |                                |                                |

Studiekod: CoVacc  
 Version Nr: 1.6  
 Datum: 2021-05-28  
 EudraCT Nr: 2021-000683-30

| Procedurer                              | Inklusion och dag vaccin dos 1 | Dag 1-2 efter dos 1 | Dag 7-10 efter dos 1 | Dag vaccin dos 2 (samt inklusion protokoll E) | Dag 1-2 efter dos 2 | Dag 7-10 efter dos 2 | Dag 14-20 efter dos 2 | 4-6 veckor efter sista vaccindos | 1 månad efter sista dos ±3 dagar | 3 mån efter sista dos ±14 dagar | 6 mån efter sista dos ±14 dagar | 1 år efter sista dos ±30 dagar | 2 år efter sista dos ±30 dagar | 3 år efter sista dos ±30 dagar | 4 år efter sista dos ±30 dagar |
|-----------------------------------------|--------------------------------|---------------------|----------------------|-----------------------------------------------|---------------------|----------------------|-----------------------|----------------------------------|----------------------------------|---------------------------------|---------------------------------|--------------------------------|--------------------------------|--------------------------------|--------------------------------|
| Provtagning enligt protokoll B          | √                              |                     | √                    | √                                             |                     | √                    |                       |                                  | √                                | √                               | √                               | √                              | √                              | √                              | √                              |
| Provtagning enligt protokoll C          | √                              | √                   | √                    | √                                             | √                   | √                    | √                     |                                  |                                  | √                               | √                               | √                              | √                              | √                              | √                              |
| Provtagning enligt protokoll D          | √                              |                     |                      |                                               |                     | √****                |                       |                                  | √                                | √                               | √                               | √                              | √                              | √                              | √                              |
| Provtagning enligt protokoll E          |                                |                     |                      | √                                             |                     | √                    |                       |                                  | √                                | √                               | √                               | √                              | √                              | √                              | √                              |
| Provtagning enligt protokoll F          |                                |                     |                      |                                               |                     |                      |                       | √                                |                                  |                                 |                                 | √                              | √                              | √                              | √                              |
| Vaccination enligt nationell samordning | √                              |                     |                      | √                                             |                     |                      |                       |                                  |                                  |                                 |                                 |                                |                                |                                |                                |
| Ogynnsamma händelser (AE & SUSAR)       |                                |                     | √**                  |                                               |                     | √***                 |                       | √##                              | √#                               | √*                              |                                 |                                |                                |                                |                                |
| Studien avslutas                        |                                |                     |                      |                                               |                     |                      |                       |                                  |                                  |                                 |                                 |                                |                                |                                | √                              |

\* Gäller för Protokoll A, B, C, D och E

\*\* Gäller för Protokoll B och C

\*\*\* Gäller för Protokoll B, C, D och E

\*\*\*\* 7-10 dagar efter sista planerade vaccinationstillfället

# Gäller för Protokoll E

## Gäller för Protokoll F

### 5.3. Biologiska provtagningsförfaranden

#### 5.3.1. Hantering, lagring och destruktion av biologiska prover

Primärt planeras venösa blodprov vid varje provtagningstillfälle men i vissa fall kan självprovtagning i hemmet ske genom kapillär blodprovstagning genomföras.

**Reducerad blodprovstagning:** Vi ämnar även provta ett större antal personer genom reducerad provtagning. Detta innefattar reduktion både i antal prov men också att bara serumprover tas. Rational för inklusion av denna grupp är att öka antal individer för statistiskt underlag över lång tid.

Studiekod: CoVacc  
Version Nr: 1.6  
Datum: 2021-05-28  
EudraCT Nr: 2021-000683-30

**Kontroll av virusbärarskap:** I en subgrupp av medverkande individer kommer detektion av virus från övre luftvägar att ske via egenprovtagning i hemmet. Dessa individer kommer tillfrågas om att provta sig upprepat samt vid symptom för att kartlägga skyddseffekt avseende bärarskap av virus.

**Uppföljning och kontroll:** De vaccinerade forskningspersonerna kommer att följas upp med återbesök och blodprovstagning enligt flödesschemat för blodprovstagning ovan. Tidsåtgången för återbesöken beräknas i normalfallet till 15 minuter. Om den vaccinerade individen får symptom som liknar covid-19 ombeds hen att lämna ett salivprov och/eller nässvabb.

### 5.3.2. Total volym blod per forskningsperson

Uppemot 40 ml blod tas vid varje provtagningstillfälle. Förutom provtagning enligt protokoll kan extra provtagning komma att utföras.

Kapillär provtagning i hemmet kan bli aktuell för en subgrupp av forskningspersoner för att mäta antikroppar vid uppföljning enligt protokoll A.

En subgrupp av forskningspersoner kommer erbjudas att medverka för detektion av virus från övre luftvägar via egenprovtagning i hemmet.

**Covid 19 provtagning** sker ifall individ rapporterar sjukdomssymptom som liknar de som infaller vid Covid 19

### 5.3.3. Biobank

Alla prover som tas i denna studie registreras i en biobank hos Biobank Norr 472, Örebro Biobank 454, Biobank Sörmland 872, Värmland Biobank 924 och Västmanland bakteriologi/virologi 84 och hanteras enligt gällande biobankslag och regelverk. Proverna kodal/pseudonymiseras för att skydda forskningspersonens identifiering. Alla prover och identifieringslistan/kodlista förvaras säkert och separat för att förhindra att obehöriga personer har tillgång till dessa.

## 5.4. Studieavslut

Studien avslutas då den sista forskningspersonen genomfört sista uppföljningen. Beslut om studieavslut i förtid tas av sponsor.

## 6. Urval av forskningspersoner

De personer som kommer att inkluderas är vuxna studieindivider  $\geq 18$  år som vaccinerats mot SARS-CoV-2. Detta sker huvudsakligen vid själva vaccinationen som utförs av regionen enligt nationella riktlinjer.

Personer som ingår i redan pågående kliniska studier av covid-19 och som uppfyller inklusionskriterier samt ej uppfyller något exklusionskriterie kommer även att tillfrågas om medverkan i CoVacc studien.

Studiekod: CoVacc  
Version Nr: 1.6  
Datum: 2021-05-28  
EudraCT Nr: 2021-000683-30

Annonsering kan komma att utföras och rekrytering sker sedan vid, eller innan det av regionerna planerade vaccinationstillfällena.

### 6.1. Inklusionskriterier

För att inkluderas i studien måste deltagaren uppfylla följande kriterier:

- Forskningspersonen har gett sitt skriftliga samtycke till att delta i studien.
- Ålder  $\geq$  18 år

### 6.2. Exklusionskriterier

Deltagare får inte inkluderas i studien om något av följande kriterier är uppfyllda:

- Ålder  $<$ 18 år
- Beslutsoförmögna personer
- Kontraindikation till vaccination
- Svår sjukdom (som bedöms påverka forskningspersonens möjlighet att fullfölja studien)
- Pågående läkemedelsbehandling som bedöms påtagligt påverka vaccinsvaret (innefattar inte inhalationssteroider och nässpray, samt tablett kortison  $\leq$ 15mg/dag. Rituximab behandling är ej ett exklusionskriterie).

### 6.3. Screening

Att forskningspersoner uppfyller alla inklusionskriterier och inte har några exklusionskriterier fastställs innan inkludering.

### 6.4. Avbrottskriterier

Forskningspersonen kan avbryta sitt deltagande i studien när som helst utan att detta medför några som helst konsekvenser för hans/hennes fortsatta behandling. Prövare/sponsor kan när som helst avsluta studien för en forskningsperson p.g.a. att forskningspersonen inte följer procedurerna i studieprotokollet.

## 7. Prövningsläkemedel

### 7.1. Beskrivning av prövningsläkemedel

Studien studerar immunsvaret efter vaccination mot Covid-19. Samtliga forskningspersoner kommer att erhålla aktivt vaccin mot Covid-19. För närvarande finns tre godkända vacciner Comirnaty BNT162b2 (Pfizer), Modernas mRNA-1273 samt AstraZeneca som kan komma att ges till forskningspersonerna enligt nationella och regionala riktlinjer samt utifrån vaccintillgång. Under studiens gång kan ytterligare vaccin mot covid-19 tillkomma och därigenom ingå i studien.

Studiekod: CoVacc  
Version Nr: 1.6  
Datum: 2021-05-28  
EudraCT Nr: 2021-000683-30

## 7.2. Dos och administreringsätt

Dosering är inget som styrs i studien utan sker enligt av läkemedelsverket godkänd dosering för varje enskilt vaccin som också är fastställt i det nationella vaccinationsprogrammet. Samtliga godkända vaccin kan ingå i denna studie. Vilket vaccin som den enskilde forskningspersonen erhåller beror på vilket vaccin som är rekommenderat för denna grupp och finns tillgängligt.

## 7.3. Packning, märkning, och hantering av prövningsläkemedel

Prövningsläkemedel märks eller förpackas inte för speciellt studien utan hanteras enligt instruktioner från tillverkarna samt ansvariga för vaccinationen mot Covid-19. Vaccin erhålls och förvaras enligt specifik produkts instruktion.

## 7.4. Spårbarhet och följsamhet till behandling

Samtliga personer som erhåller vaccin kommer i anslutning till vaccinationstillfället att efter skriftlig och muntlig information få signera ett samtycke. Enligt nationella riktlinjer kommer även alla vaccinerade att registreras i det nationella vaccinationsregistret. Typen av vaccin mot covid-19 kommer att registreras i studiens Case Report Form (CRF).

## 7.5. Samtidig användning av andra läkemedel

Läkemedel som anses nödvändiga för forskningspersonens säkerhet och välbefinnande kan ges efter prövarnas bedömning, om annat inte specificeras i exklusionskriterierna. Samtidig medicinering kommer att registreras i Case Report Form (CRF). Patienter med Multipel Skleros som behandlas med Rituximab kommer inkluderas efter individuell bedömning.

## 7.6. Behandling efter studiens slut

Ingen behandling kommer att ske efter studiens slut. Forskningspersonerna kommer att erhålla information om antikropps-nivån 1 år efter vaccinationen.

# 8. Metoder för mätning av utfallsmått för klinisk effekt och säkerhet

## 8.1. Metoder för mätning av utfallsmått för klinisk effekt och säkerhet

Det primära utfallsmåttet är att undersöka nivån av specifika antikroppar mot SARS-CoV-2 protein årligen upp till 4 år efter vaccination. Studien använder sig av ELISA metod för att mäta dessa antikroppar.

Vid uppföljande besök efter vaccination efterfrågas eventuella biverkningar av vaccineringen och dessa noteras i eCRF.



Studiekod: CoVacc  
Version Nr: 1.6  
Datum: 2021-05-28  
EudraCT Nr: 2021-000683-30

### 8.1.1. Primärt utfallsmått (variabel)

Det primära utfallsmåttet är att undersöka nivån av specifika antikroppar mot SARS-CoV-2 protein årligen upp till fyra år efter vaccination.

### 8.1.2. Sekundära utfallsmått (variabler)

Sekundära utfallsmått är analyser för att utreda hur det mänskliga immunförsvaret reagerar vid Covid 19-vaccin.

## 9. Hantering av ogynnsamma medicinska händelser

Denna studie ämnar följa personer som får vaccination mot Covid-19 enligt det nationella vaccinationsprogrammet. Vaccinationen kommer inte hanteras av studiepersonal utan av regionernas personal.

Studien kommer lista eventuella misstänkta allvarlig oförutsedda biverkningar (SUSAR). Detta kommer utföras genom att vid uppföljning 3 månader efter sista planerade dos vaccin tillfrågas forskningspersonen om eventuella AE/SAE efter vaccinationen. För deltagare i protokoll B och C tillfrågas de även vid provtagningstillfällena 7-10 dagar efter varje vaccindos, för deltagare i protokoll D vid provtagningstillfället 7-10 dagar efter sista planerade vaccindos och för deltagare i protokoll E vid provtagningstillfället 7-10 dagar efter sista planerade vaccindos samt vid uppföljning 1 månad.

Om personen varit sjukhusvårdad eller haft annan allvarlig händelse kommer detta bedömas och i de fall händelsen kan anses vara en misstänkt allvarlig oförutsedd biverkan (SUSAR) kommer det följas upp med hjälp av journalutskrifter från vårdtillfället.

I de fall händelsen bedöms vara en potentiell SUSAR kommer ansvarig studieläkare rapportera händelsen till sponsor som en SUSAR i studien.

De händelser som rapporterats av regionen som en SUSAR kommer listas i studien men inte rapporteras till myndigheter eftersom det då blir en dubbelrapportering.

### 9.1. Definitioner

#### 9.1.1. Incident (Adverse Event, AE)

Varje incident (AE), ogynnsam medicinsk händelse, eller försämring av ett existerande medicinskt tillstånd hos en forskningsperson som fått ett prövningsläkemedel, oavsett om det har orsakssamband med behandlingen eller inte, d.v.s. kan vara ett ogynnsamt och oönskat tecken (inklusive ett onormalt laboratoriefynd), symptom eller sjukdom som tidsmässigt är förknippat med användning av ett prövningsläkemedel, oavsett om det är relaterat till prövningsläkemedlet eller inte.

#### 9.1.2. Biverkning (Adverse Reaction, AR)

Vid klinisk användning innan ett nytt läkemedel fått godkännande eller innan dess nya användningsområden godkänts, och särskilt då den terapeutiska dosen inte kan fastställas

Studiekod: CoVacc  
Version Nr: 1.6  
Datum: 2021-05-28  
EudraCT Nr: 2021-000683-30

bör all skadlig och oavsiktlig reaktion på ett läkemedel oavsett dos anses vara biverkningar AR (Adverse Reaction). Frasen "reaktion" på ett läkemedel innebär att ett orsakssamband mellan ett läkemedel och en biverkning är åtminstone en rimlig möjlighet, det vill säga att förhållandet inte kan uteslutas.

### 9.1.3. Allvarlig incident (Serious Adverse Event, SAE)

SAE: Varje allvarlig incident som vid någon dos

- resulterar i död
- är livshotande
- föranleder sjukhusvistelse eller förlängd sjukhusvistelse
- orsakar bestående eller betydande invaliditet eller funktionsnedsättning
- resulterar i en medfödd skada/missbildning

Medicinsk och vetenskaplig bedömning bör utföras för att bestämma om en händelse är "allvarlig" och om det skulle föranleda att rapporteras i andra situationer, till exempel viktiga medicinska händelser som kanske inte är direkt livshotande eller resulterar i dödsfall eller sjukhusvistelse, men kan äventyra forskningspersonen eller kan kräva ingrepp för att förhindra ett av de andra resultaten som anges i definitionen ovan. Dessa bör också normalt betraktas som SAEs.

### 9.1.4. Misstänkt allvarlig oförutsedd biverkning (SUSAR)

SUSAR: En biverkning/händelse som är allvarlig, oförutsedd och misstänks vara orsakad av behandlingen, d.v.s. biverkningar som inte finns med i prövarhandboken (Investigator's Brochure - IB) eller produktresumén.

## 9.2. Bedömning av potentiella SUSAR

### 9.2.1. Bedömning av orsakssamband

Prövaren på respektive studiesite ansvarar för att avgöra om en händelse kan anses vara en misstänkt allvarlig oförutsedd biverkan. I bedömningen anges samtidigt om det finns ett orsakssamband mellan händelsen och användningen av Covid vaccinationen.

Alla händelser ska kategoriseras antingen som troligen relaterade, möjligen relaterade, osannolikt relaterade eller inte relaterade enligt definitionen nedan:

**Troligen relaterad** Klinisk händelse, inklusive onormala svar från laboratorieanalyser, som uppträder inom rimlig tid efter administrering av interventionen/prövningsläkemedlet. Osannolikt att händelsen kan hänföras till underliggande sjukdom eller andra läkemedel utan den är mest sannolikt orsakat av prövningsläkemedlet och uppkomsten är rimlig i samband med användningen av prövningsläkemedlet.

**Möjligen relaterad:** Klinisk händelse, inklusive onormala svar från laboratorieanalyser, som uppträder inom rimlig tid efter administrering av interventionen/prövningsläkemedlet. Händelsen kan förklaras av prövningsläkemedlet och uppkomsten är rimlig i samband med användningen av prövningsläkemedlet, men det finns inte tillräcklig information för att

Studiekod: CoVacc  
Version Nr: 1.6  
Datum: 2021-05-28  
EudraCT Nr: 2021-000683-30

fastställa sambandet. Händelsen kan förklaras av underliggande sjukdom eller andra läkemedel.

**Osannolikt relaterad:** Händelsen är osannolikt relaterad till interventionen/prövningsläkemedlet och kan förklaras av andra läkemedel eller underliggande sjukdom.

**Inte relaterad:** Klinisk händelse, inklusive onormala svar från laboratorieanalyser, men som inte är rimlig i förhållande till användningen av interventionen/prövningsläkemedlet.

### 9.2.2. Bedömning av intensitet

Varje incident ska klassificeras av prövaren som mild, måttlig eller uttalad.

**Mild:** Händelsen är relativt mild och övergående i naturen men påverkar inte forskningspersonens normala liv.

**Måttlig:** Händelsen orsakar försämring av funktion men påverkar inte hälsan. Händelsen kan vara tillräckligt obehaglig och störa normala aktiviteter men hindrar dem inte helt.

**Uttalad:** Händelsen orsakar försämring av funktion eller arbetsförmåga eller utgör en hälsorisk för forskningspersonen.

### 9.2.3. Bedömning av svårighetsgrad

Prövaren ansvarar för att bedöma svårighetsgraden (allvarlig eller icke-allvarlig). Om incidenten bedöms som allvarlig ska detta registreras i studiens eCRF.

## 9.3. Rapportering av incidenter

I samband med uppföljningen 3 månader efter sista planerade dos vaccin tillfrågas forskningspersonen om eventuella AE/SAE efter vaccination mot Covid-19 förutom vid protokoll F. För deltagare i protokoll B och C tillfrågas de även vid provtagningstillfällena 7-10 dagar efter varje vaccindos, för deltagare i protokoll D vid provtagningstillfället 7-10 dagar efter sista planerade vaccindos, för protokoll E vid 7-10 dagar samt 1 månad efter sista planerade vaccindos och för protokoll F 4-6 veckor efter sista planerade vaccindos.

Listning av incidenter görs av prövaren direkt i eCRF/pCRF. Som minimum beskrivs händelsen och datum.

### 9.3.1. Listning av incidenter (AE)

Alla AE kommer listas i eCRF men kommer inte rapporteras.

### 9.3.2. Rapportering av allvarliga incidenter (SAE)

Allvarliga incidenter, (SAE) rapporteras till sponsor inom 24 timmar från att prövaren fått kännedom om SAE. För redan kända biverkningar för respektive vaccin rapporteras inte till sponsor utan listas enbart i eCRF.

Uppföljande information som beskriver utfall och hantering av SAE rapporteras så fort den informationen finns tillgänglig.

Studiekod: CoVacc  
Version Nr: 1.6  
Datum: 2021-05-28  
EudraCT Nr: 2021-000683-30

### 9.3.3. Registrering och rapportering av allvarliga incidenter (SUSAR)

Denna studie ämnar följa personer som i klinisk vård får vaccination mot Covid-19. Vaccinationen kommer inte hanteras av studiepersonal utan av regionernas personal.

Allvarliga incidenter som inträffar efter vaccination kommer i prövningen att insamlas vid 3 månaders uppföljningen i studien. I de fall en händelse bedöms vara en SUSAR kommer ansvarig studieläkare försäkra sig om att denna händelse är rapporterad av sjukvården som en biverkan enligt LVFS: 2012:14,19§.

Identifierade allvarliga incidenter som av sponsor bedöms vara SUSAR och som inte sedan tidigare rapporterats av regionerna kommer rapporteras löpande till Läkemiddelverket av sponsor.

SUSARs, som är dödliga eller livshotande rapporteras snarast möjligt och senast inom 7 dagar efter att det inträffade har blivit känt för sponsor. Relevanta uppföljande uppgifter sänds därefter in inom ytterligare 8 dagar. Övriga SUSAR rapporteras snarast möjligt och senast inom 15 dagar efter de kommit till sponsors kännedom. Information om SUSAR som inträffar under prövningen sammanställs av sponsor och förmedlas till samtliga prövare i studien.

### 9.4. Årlig säkerhetsrapport (Development Safety Update Report, DSUR)

En årlig säkerhetsrapport skickas till Läkemiddelverket och Överklagandenämnden för etikprövning. I säkerhetsrapporten listas inträffade allvarliga händelser definierade som SUSAR. SUSAR har inte rapporterats via studien utan via regionernas ordinarie rapporteringsväg för allvarliga biverkningar. En sammanfattande bedömning av säkerhetsläget görs för forskningspersonerna samt en nytta/riskvärdering för studien.

### 9.5. Referenssäkerhetsinformation

Produktresumé för godkänt vaccin kommer att användas som referenssäkerhetsinformation för att bedöma om en incident är förväntad eller inte. Eftersom val av vaccin inte styrs av studien kan olika vaccins produktresuméer bli aktuellt.

## 10. Statistik

Det saknas kunskap för att uppskatta det långvariga immunsvaret efter vaccination. I den unika situation som är här vi därför i det närmaste ett obefintligt underlag för att göra en traditionell statistisk powerberäkning. Det beror också på faktorer som ligger utanför vår kontroll att bestämma vilket covid-19 vaccin som ges, och om individer kommer välja att ta vaccin. Vår ansats tar höjd för både att inte alla väljer att fullfölja vaccineringen och för att vi kan behöva rekrytera olika kontrollgrupper på basis av olika vaccinstrategier som bestäms med kort varsel.

Vi planerar för att inkludera totalt upp till 3000 individer. Av dessa förväntas majoriteten genomgå reducerad provtagning. För att studera långtidsimmuniteten, kommer vi att

Studiekod: CoVacc  
Version Nr: 1.6  
Datum: 2021-05-28  
EudraCT Nr: 2021-000683-30

undersöka nivån av specifika antikroppar mot SARS-CoV-2 årligen, upp till fyra år efter vaccination. För frågeställningar 2 och 3 uppskattar vi antalet individer till ca 500.

## 10.1. Statistisk analys

### 10.1.1. Statistisk metod

Nivå av antikroppar mot SARS-CoV-2 S är en kraftigt positivt skev variabel. En detaljerad deskriptiv analys kommer genomföras där decentiler av variabel av antikropps nivåer presenteras, stratifierat på individer tidigare infekterade/ej tidigare infekterade med SARS-CoV-2. Den primära frågeställningen kommer att analyseras med Mann-Whitney U-test.

### 10.1.2. Bortfall

Bortfallsanalys av forskningspersoner som valt att avbryta sitt deltagande i studien kommer att genomföras. Den primära analysen kommer att genomföras på dem individer som kvarstår i studien. Multipel imputation av värden på individer som valt att avbrutit deltagande sedan senaste mättillfället kommer att genomföras som en sensitivetsanalys, om tillgängligt data bedöms tillräcklig för att sådan analys kan göras med god validitet.

## 10.2. Justering av signifikans och konfidensintervall

Detta är i grund och botten är en observationsstudie där individer inom det ordinarie vaccinationsprogrammet följs och publicering av resultat kommer att ske löpande under uppföljning. Justering av signifikansnivå för dem multipla testtillfällen kommer inte att göras, då ett naturligt sätt att justera över de olika publikationerna kommer vara svår att motivera. Eventuell ökning av risk av statistiska typ 1-fel allteftersom resultat från studien ackumuleras kommer diskuteras i respektive publicerad artikel.

## 10.3. Dimensionsberäkning

Det råder av naturliga skäl stor osäkerhet kring läge och spridning i nivån av antikroppar mot SARS-CoV-2 S efter upp till fyra års uppföljning. Eftersom antikropps nivå mätts på en kontinuerlig skala där spridningen i antikropps nivå förväntas öka med tiden kommer troligtvis behovet av antal forskningspersoner för att nå minst 80% power öka med uppföljningstiden. Studien kommer därför att anta en adaptiv ansats gällande dimensionering. Inledningsvis planeras 3000 forskningspersoner att inkluderas. Interimsanalyser kommer att genomföras årligen i upp till tre år, skulle beräkningar i dessa visa att kommande analyser av uppföljningar riskerar att bli underdimensionerade finns möjlighet att annonsera för rekrytering av nya forskningspersoner.

## 10.4. Interimsanalys

Planerade interimsanalyser kommer genomföras årsvis i upp till tre år med huvudsakligt syfte att utvärdera spridning i data för möjliggörande av uppdatering av studiens dimensionering. Eftersom dessa utvärderingar är icke-jämförande och därför inte påverkar error rate i hypotesprövningar kommer inte justering för detta att genomföras.

Studiekod: CoVacc  
Version Nr: 1.6  
Datum: 2021-05-28  
EudraCT Nr: 2021-000683-30

## 11. Kvalitetskontroll och kvalitetssäkring

### 11.1. Kvalitetssäkring och sponsors övervakning

Det är prövarens ansvar att CRF granskas för fullständighet och noggrannhet och att lämpliga CRF-sidor också är signerade och daterade. Det är också prövarens ansvar att säkerställa efterlevnad av ICH-GCP och alla tillämpliga lagkrav. Tillsynsmyndigheter kan genomföra en myndighetsinspektion av denna prövning. Sådana granskningar / inspektioner kan inträffa när som helst under eller efter avslutad prövning.

### 11.2. Monitorering

För att säkerställa att studien genomförs enligt protokollet, att data samlas in, dokumenteras och rapporteras enligt ICH-GCP samt gällande etiska- och regulatoriska krav, kommer studien att monitoreras av en oberoende monitor innan studien påbörjas, under studiens gång samt efter det att studien avslutats. Monitoreringen utförs enligt studiens monitoreringsplan och syftar till att säkerställa att forskningspersonernas rättigheter, säkerhet och välbefinnande tillgodoses samt att data i CRF är ifyllda, korrekta och överensstämmer med källdata.

Eftersom vaccinationen inte är en del av studien kommer monitoreringen att utföras på distans med hjälp av videomöten med studiepersonal på de olika site:n. Studien planerar en förenklad monitorering detta då studien inte ansvarar för vaccinationen mot Covid 19. Trots att ansvaret för säkerhet kring Covid 19 vaccinationen vilar på regionerna kommer studiepersonal att fråga upp om biverkningar och allvarliga händelser. SUSAR kommer i de fall det inte är inrapporterat till myndigheter rapporteras in av studiepersonal.

### 11.3. Källdata

Prövaren måste behålla källdokument för varje forskningsperson i studien. Ett dokument över vad som klassificerats som källdata i studien ska finnas i prövarpärmen (Investigator Site File, ISF). Prövaren måste se till att alla källdokument är tillgängliga för monitorering och annan kvalitetskontroll.

Källdata definieras före studiestart på varje enskilt prövningsställe (site).

### 11.4. Avvikelse eller allvarliga överträdelser

Överträdelser och avvikelser från prövningsprotokoll, GCP och andra regelverk som på ett signifikant sätt direkt påverkar, eller med stor sannolikhet skulle påverka, forskningspersoner i Sverige eller prövningens vetenskapliga värde ska omgående rapporteras inom 7 dagar (från kännedom) till LV. Det är sponsorns ansvar att bedöma konsekvenserna av inträffade avvikelser, och därmed också besluta om LV ska informeras.

Mindre avvikelser som inte påverkar forskningspersonernas integritet eller säkerhet, eller signifikant påverkar prövningens vetenskapliga värde dokumenteras i prövningsdokumentationen hos huvudprövare och hos sponsorn.

Studiekod: CoVacc  
Version Nr: 1.6  
Datum: 2021-05-28  
EudraCT Nr: 2021-000683-30

## 11.5. Audit och inspektioner

Auktoriserade representanter för sponsorn och behöriga myndigheter kan utföra audit eller inspektioner på provningsstället, inklusive källdataverifiering. Prövaren ska se till att alla källdokument är tillgängliga för audit och inspektion. Syftet med en audit eller inspektion är att systematiskt och oberoende granska alla studierelaterade aktiviteter och dokument, för att avgöra om dessa aktiviteter utfördes, registrerades, analyserades och rapporterades korrekt enligt protokollet, Good Clinical Practice (GCP) och tillämpliga regelverk.

## 12. Etik

### 12.1. Följsamhet till protokollet, GCP och regelverket

Studien kommer att genomföras enligt protokoll, Helsingforsdeklarationen, ICH-GCP (god klinisk sed), och de gällande nationella och internationella regelverk som berör denna kliniska studie. Detta för att säkerställa forskningspersonernas säkerhet och integritet liksom kvalitén på data som samlas in.

### 12.2. Etikprövning av studien

En ansökan till Etikprövningsmyndigheten har godkänts, Dnr 2021-00055.

Det slutgiltiga studieprotokollet för läkemedelsprövningar måste, som en del i ansökan om tillstånd till klinisk läkemedelsprövning, godkännas av både Etikprövningsmyndigheten och Läkemedelsverket, innan prövningen får genomföras. Den slutgiltiga versionen av informerat samtyckesformulär och annan information som ges till forskningspersonerna ska godkännas eller ges ett skriftligt positivt yttrande av etikprövningsmyndigheten. Etikprövningsmyndigheten och Läkemedelsverket ska informeras om eventuella ändringar av protokollet i enlighet med gällande krav.

### 12.3. Procedur för inhämtande av informerat samtycke

Huvudprövaren vid varje provningsställe ska säkerställa och delegera till läkare eller sjuksköterska att forskningspersonen ges full och adekvat muntlig och skriftlig information om studien, dess syfte, eventuella risker och fördelar samt inklusion-/exklusionskriterier. Forskningspersoner måste också meddelas att de är fria att avbryta sitt deltagande i studien när som helst utan att behöva meddela orsak.

Forskningspersonen ska ges möjlighet att ställa frågor och tillåtas tid att överväga den information som lämnats. Om personen väljer att delta så signerar forskningspersonen och prövaren eller sjuksköterskan samtycket.

En kopia av forskningspersons informationen samt det signerade samtycket lämnas till forskningspersonen. En procedur med elektroniskt samtycke kan bli aktuellt senare under studiens gång om en teknisk lösning för detta kan skapas som uppfyller de regulatoriska kraven. Forskningspersonens signerade och daterade informerade samtycke måste erhållas innan man utför någon studiespecifik aktivitet i studien. Varje forskningsperson som deltar i studien kommer att identifieras med ett forskningspersonnummer på en

Studiekod: CoVacc  
Version Nr: 1.6  
Datum: 2021-05-28  
EudraCT Nr: 2021-000683-30

forskningspersonens identifikationslista. Forskningspersonen samtycker till att monitorer, auditörer och inspektörer får tillgång till deras journal och övrig källdata. Om ny information tillkommer i studien så har forskningspersonen rätt att åter ta ställning till om han/hon vill fortsätta sitt deltagande.

#### 12.4. Dataskydd

Om någon del av databehandlingen utförs av någon annan organisation, inom eller utanför EU, så kommer lämpliga avtal och/eller annan dokumentation upprättas, för att säkerställa att bearbetningen genomförs i enlighet med bestämmelser i dataskyddsförordningen och andra relevanta lagstiftningar, innan någon dataöverföring sker.

Det informerade samtyckesformulärets innehåll överensstämmer med relevant integritets och dataskyddslagstiftning. I forskningspersonsinformationen och det informerade samtyckesformuläret kommer forskningspersonerna att ges fullständig information om hur insamling, användning och offentliggörande av deras studieuppgifter kommer att ske.

Forskningspersonsinformationen och det informerade samtyckesformuläret kommer att förklara hur studieuppgifter lagras för att upprätthålla sekretess i enlighet med nationell datalagstiftning. Insamlad data kommer lagras i eCRF REDCap på Umeå Universitets lokala säkra servrar. Studiens eCRF är bara tillgängligt för studiepersonal och kräver tvåfaktors-autentisering för inloggning. Alla uppgifter som bearbetas av sponsorn kommer att vara pseudonymiserade och identifieras med Studiekod/Studie ID/Initialer.

Det informerade samtyckesformuläret kommer också att förklara att för verifiering av data kan auktoriserade representanter för sponsorn, samt relevant myndighet, kräva tillgång till delar av sjukhus- eller studiejournaler som är relevanta för studien, inklusive forskningspersonens medicinska historia.

#### 12.5. Försäkringar

Forskningspersonerna är försäkrade genom patientskadeförsäkringen samt läkemedelsförsäkringen för aktuellt erhållet covid-19 vaccin.

### 13. Väsentlig ändring av studien

Väsentliga ändringar av det undertecknade protokollet är endast möjliga genom godkända protokolltillägg (amendments) och enligt överenskommelse från alla ansvariga personer. Uppgifter om icke-väsentliga ändringar ska tydligt noteras i det ändrade protokollet.

I den händelse att väsentliga ändringar av protokollet (t.ex. ändring av huvudsyftet, primära eller sekundära variabler, metod att mäta primärvariabel, ändring av provningsläkemedel eller dosering) kommer att göras under studiens gång så ska godkännande från Etikprövningsmyndigheten samt Läkemedelsverket inhämtas innan ändringarna implementeras. En ändring som berör ett nytt provningsställe, ny provare och eller en ny forskningspersonsinformation ska endast godkännas av Etikprövningsmyndigheten.



Studiekod: CoVacc  
Version Nr: 1.6  
Datum: 2021-05-28  
EudraCT Nr: 2021-000683-30

Icke väsentliga ändringar ska registreras och föras in i dokumentationen när den sedan lämnas in, till exempel i eventuell efterföljande anmälan av en väsentlig ändring eller i samband med inrapportering av End of Trial.

## 14. Insamling, hantering och arkivering av data

Forskningspersoner som deltar i studien kodas med specifika forskningspersonnummer. Alla forskningspersoner registreras på en forskningspersonsidentifikationslista som kopplar samman forskningspersonens namn och personnummer med ett forskningspersonnummer.

All data ska registreras, hanteras och lagras på ett sätt som möjliggör en korrekt rapportering, tolkning och verifiering. Kompletta provrörelser, samt källdokument kommer att arkiveras i minst 10 år efter att studien är avslutad. Källdata i patientjournalssystem förvaras och arkiveras enligt respektive sjukhusregions bestämmelser.

Forskningsperson som vaccineras mot Covid-19 inom upptagningsområden för Region Örebro län, Region Sörmland, Region Värmland, Region Västmanland och Region Västerbotten kommer att erbjudas att vara med i studien. Information om forskningspersonernas samsjuklighet, läkemedelshistoria samt aktuella hälsotillstånd kommer att insamlas och sparas i en elektronisk databas.

Varje forskningsperson erhåller en kod. Kodnyckeln förvaras i ett låst brandsäkert skåp i respektive infektionskliniks lokaler. Endast studieläkare och studiesköterska har tillgång till kodnyckeln. För sammanhållen analys av data både pseudonymiserad klinisk och laboratedata kommer databas att inrättas vid Umeå Universitets med multifaktor auktoriseringsprotokoll. Dessa lagringsmedia säkerhetskopieras regelbundet och är skyddade för obehörigas användning, bearbetning och stöld. Uppgifterna kommer att bevaras så länge forskningsprojektet pågår, och minst 10 år efter att de sista resultaten publicerats från forskningsprojektet.

För att kunna bidra till bredare kunskap kring vaccin-inducerade immunsvår kommer oidentifierad klinisk metadata kopplad till laboratedata att skickas för analys till tredje part. För att säkerställa vetenskaplig redlighet kommer data kopplat till pseudonymiserat (kodat) klinisk data att kunna granskas och användas av andra forskare i framtiden. Om forskningspersonen väljer att återta sitt samtycke kommer ingen mer information att samlas in, men den information som redan föreligger kommer att användas i studien.

### 14.1. Case Report Form (Forskningspersonsformulär)

Ett elektroniskt Case Report Form (eCRF) används för datainsamling. I studien kommer eCRF REDCap att användas. Prövaren ska se till att uppgifterna registreras och att eventuella korrigeringar i CRF sker enligt vad som anges i studieprotokollet och i enlighet med instruktionerna. Prövaren ska säkerställa att de registrerade uppgifterna är korrekta, fullständiga och att rapportering sker enligt de tidslinjer som förutbestämts. Prövaren signerar det avslutade CRFet. En kopia av avslutat CRF kommer att arkiveras på provningsstället.

Studiekod: CoVacc  
Version Nr: 1.6  
Datum: 2021-05-28  
EudraCT Nr: 2021-000683-30

## 15. Meddelande att studien är avslutad, rapportering och publicering

Senast 90 dagar efter studiens avslutande ska Läkemedelsverket informeras genom att "Declaration of End of Trial Notification" skickas in.

Inom ett år efter avslutad studie analyseras resultaten, en klinisk studierapport med individdata utarbetas och studieresultaten rapporteras även in till EudraCT-databasen.

## 16. Referenser

1. Strohmeier S, Simon V, Aberg J, Reich DL, Krammer F, Cordon-Cardo C. Robust neutralizing antibodies to SARS-CoV-2 infection persist for months. *Science*. 2020 Dec 4;370(6521):1227-1230. doi: 10.1126/science.abd7728. Epub 2020 Oct 28. PMID: 33115920; PMCID: PMC7810037.
2. Florian Krammer, Komal Srivastava, the PARIS team, Viviana Simon. Robust spike antibody responses and increased reactogenicity in seropositive individuals after a single dose of SARS-CoV-2 mRNA vaccine  
doi: <https://doi.org/10.1101/2021.01.29.21250653>
3. Saman Saadat, Zahra Rikhtegaran-Tehrani, James Logue, Michelle Newman, Matthew B Frieman, Anthony D. Harris, Mohammad M. Sajadi Single Dose Vaccination in Healthcare Workers Previously Infected with SARS-CoV-2. medRxiv 2021.01.30.21250843;  
doi: <https://doi.org/10.1101/2021.01.30.21250843>
